# Supplementary material
Source: MDPI journal article supplement (https://www.mdpi.com/1424-8247/14/3/183)
Supplement: s1 [file s1]

# Data 1. <sup>1</sup>H-NMR spectral analysis of compound 1

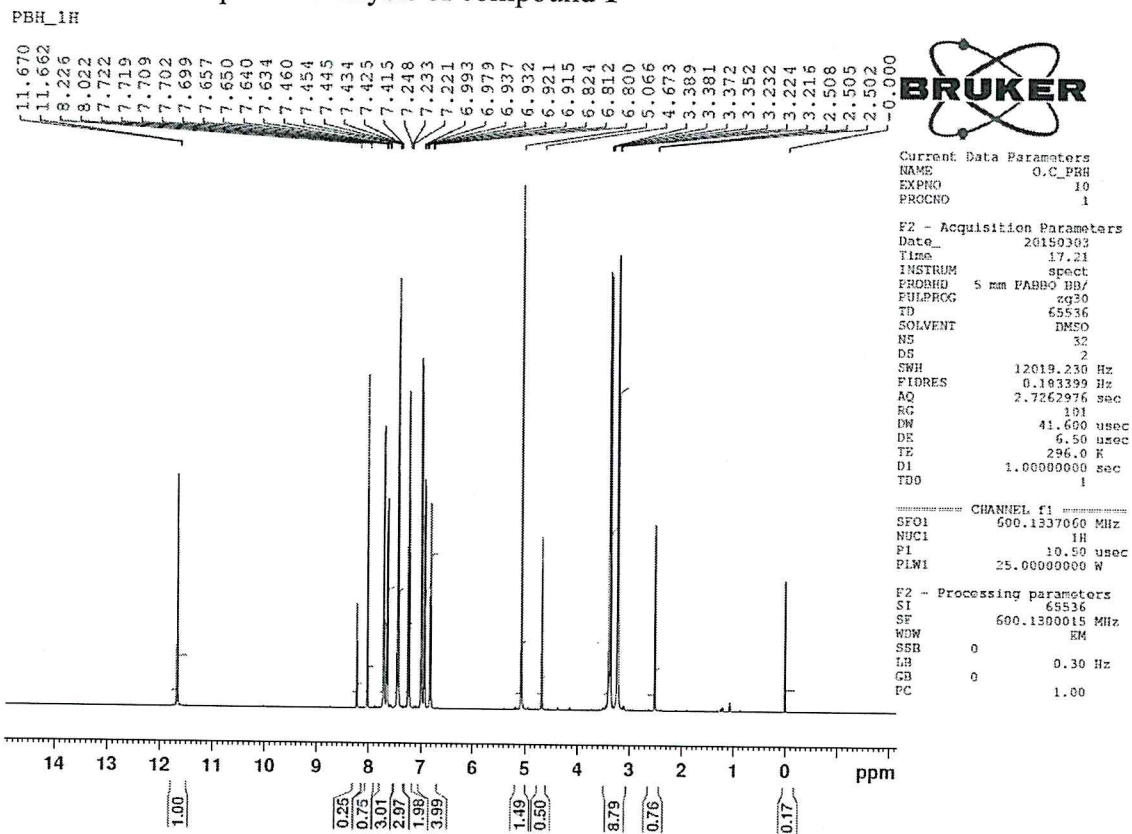

# Data 2. <sup>13</sup>C-NMR spectral analysis of compound 1

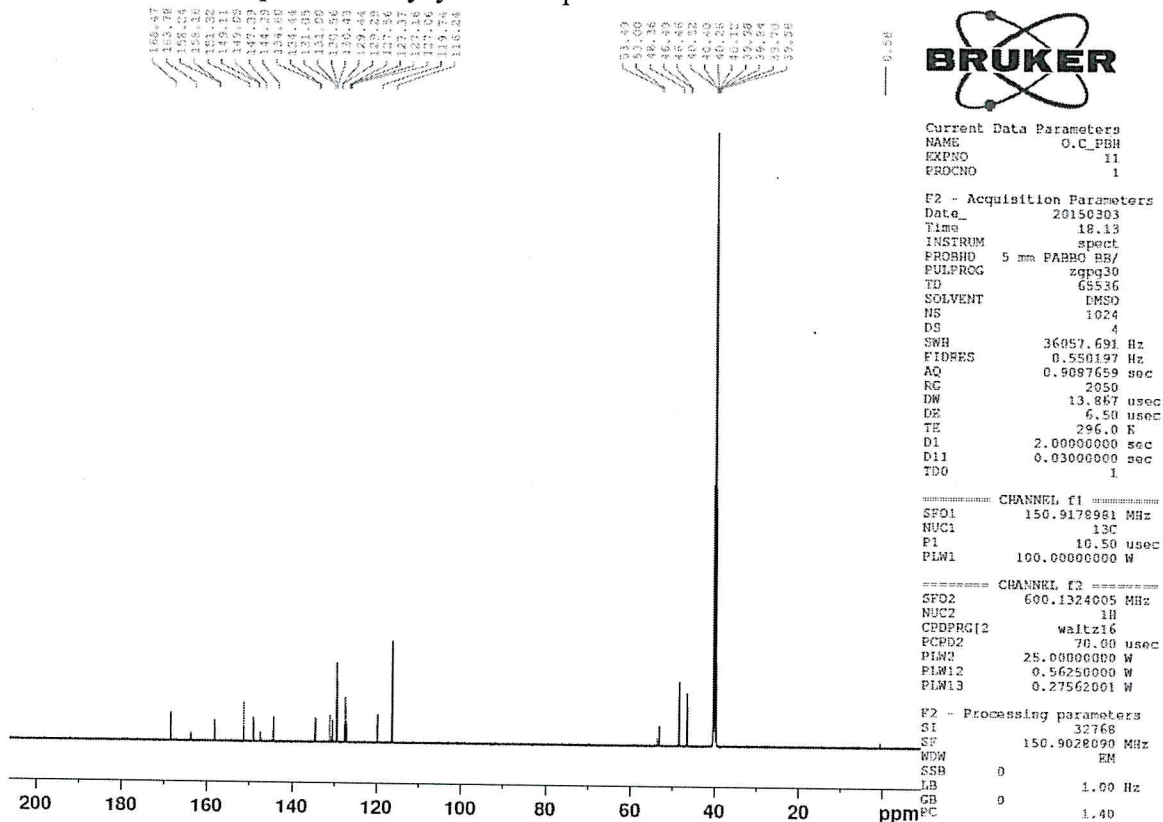

### Data 3. Mass spectral analysis of compound 1

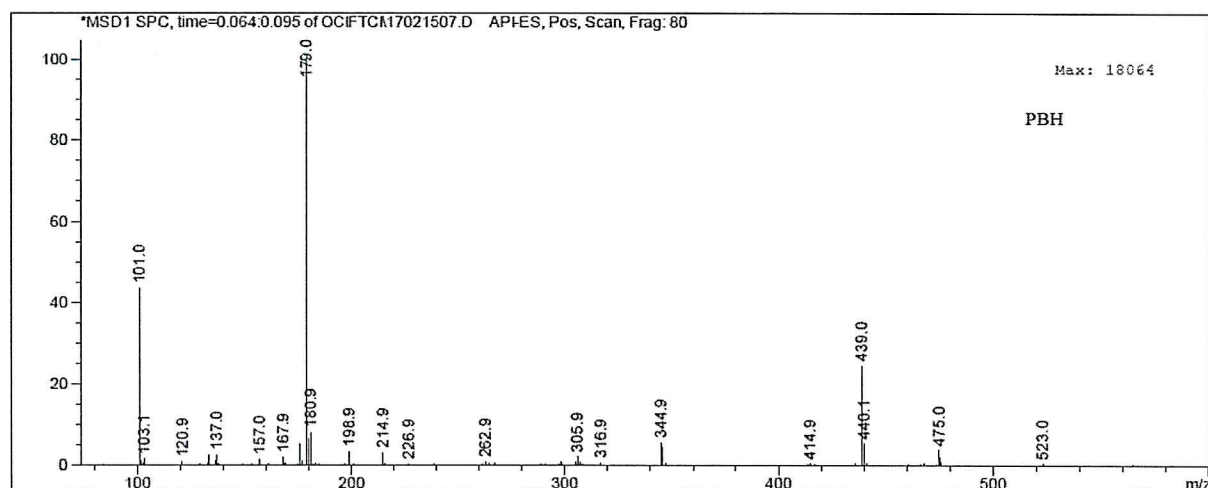

### Data 4. <sup>1</sup>H-NMR spectral analysis of compound 2

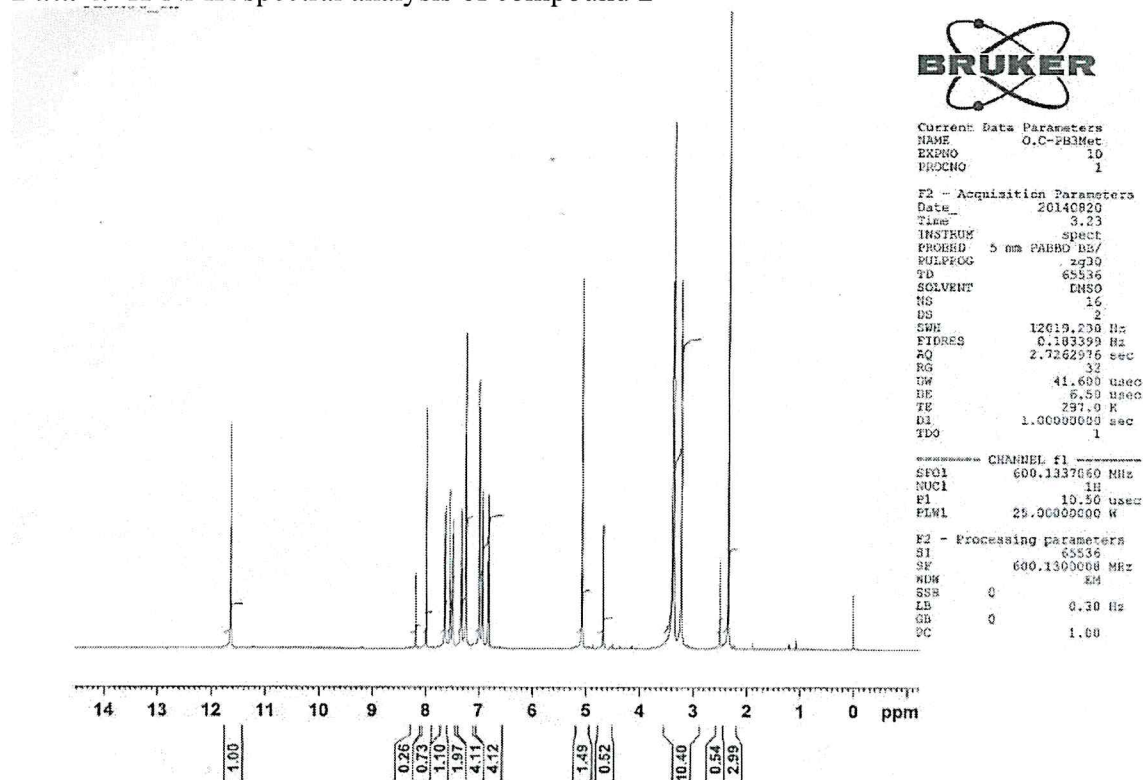

# Data 5. $^{13}\text{C}$ -NMR spectral analysis of compound 2

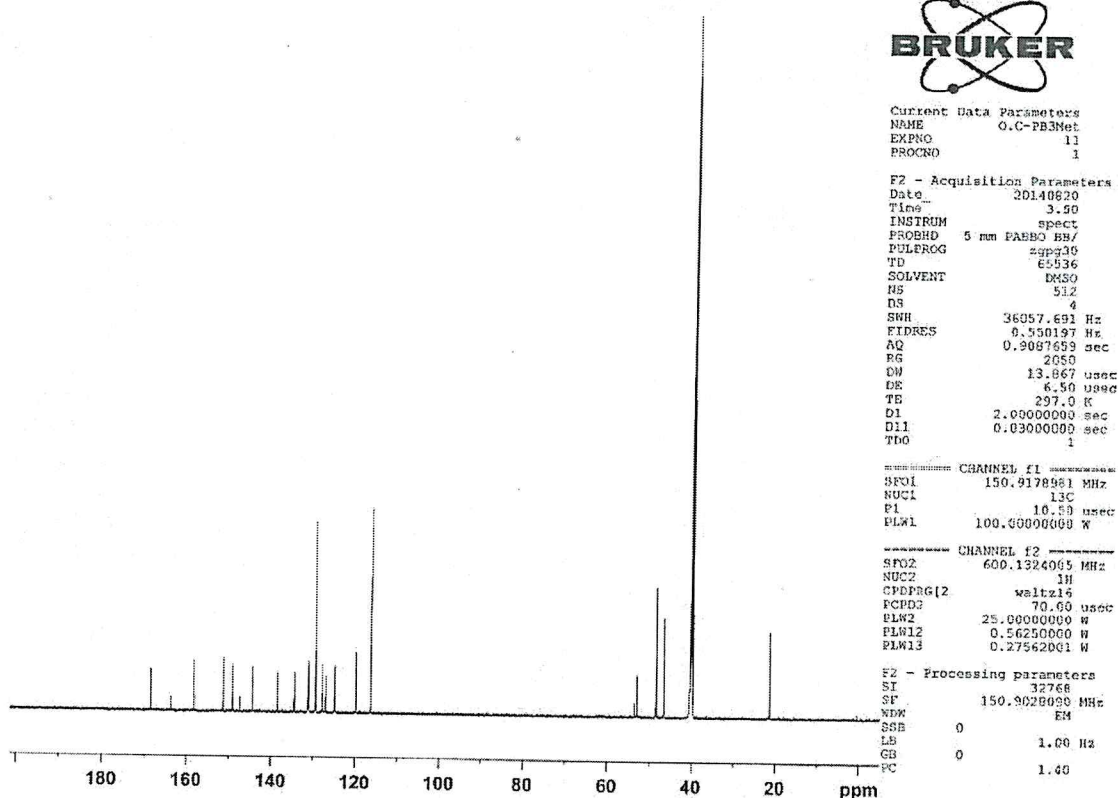

## Data 6. Mass spectral analysis of compound 2 Qualitative Analysis Report

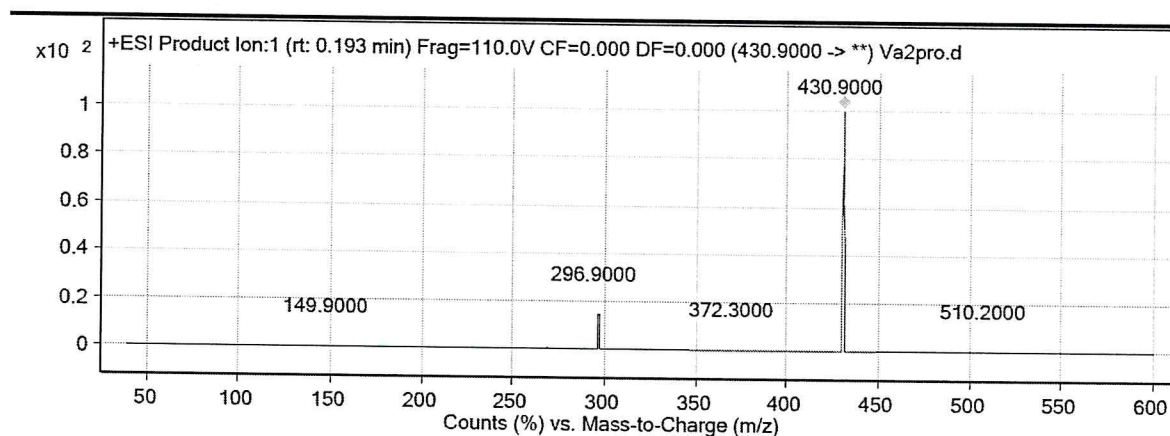

### Peak List

| m/z   | z | Abund     |
|-------|---|-----------|
| 92.5  | 2 | 55.68     |
| 118   |   | 59.1      |
| 149.9 |   | 64.42     |
| 241.4 | 2 | 66.78     |
| 242.2 |   | 79.38     |
| 252.5 | 2 | 56.42     |
| 268.8 |   | 1107.38   |
| 296.9 |   | 25721.48  |
| 429.7 |   | 423.1     |
| 430.9 |   | 172665.95 |

# Data 7. $^1\text{H}$ -NMR spectral analysis of compound 3

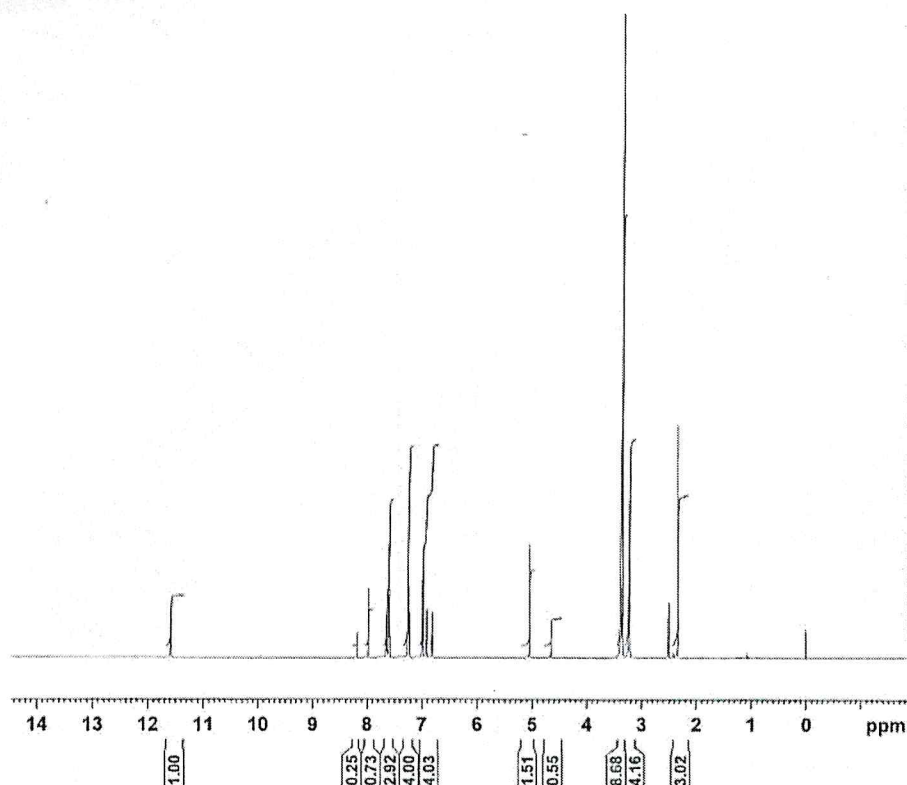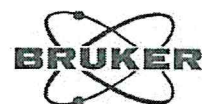

Current Data Parameters  
NAME O.C-PB4Met  
EXPNO 10  
PROCNO 1

F2 - Acquisition Parameters  
Date\_ 20140820  
Time 6.21  
INSTRUM spect  
PROBHD 5 mm PABBO BB/  
PULPROG zg30  
TD 65536  
SOLVENT DMSO  
NS 16  
DS 2  
SWH 12019.230 Hz  
FIDRES 0.183399 Hz  
AQ 2.7262976 sec  
RG 51  
DM 41.600 usec  
DE 6.50 usec  
TE 297.0 K  
D1 1.08000000 sec  
TDG 1

===== CHANNEL f1 =====  
SFO1 500.1317060 MHz  
NUC1 1H  
P1 10.50 usec  
PLW1 25.0000000 W

F2 - Processing parameters  
SI 65536  
SF 500.1309022 MHz  
WDW EM  
SSB 0  
LB 0.30 Hz  
GB 0  
PC 1.00

# Data 8. $^{13}\text{C}$ -NMR spectral analysis of compound 3

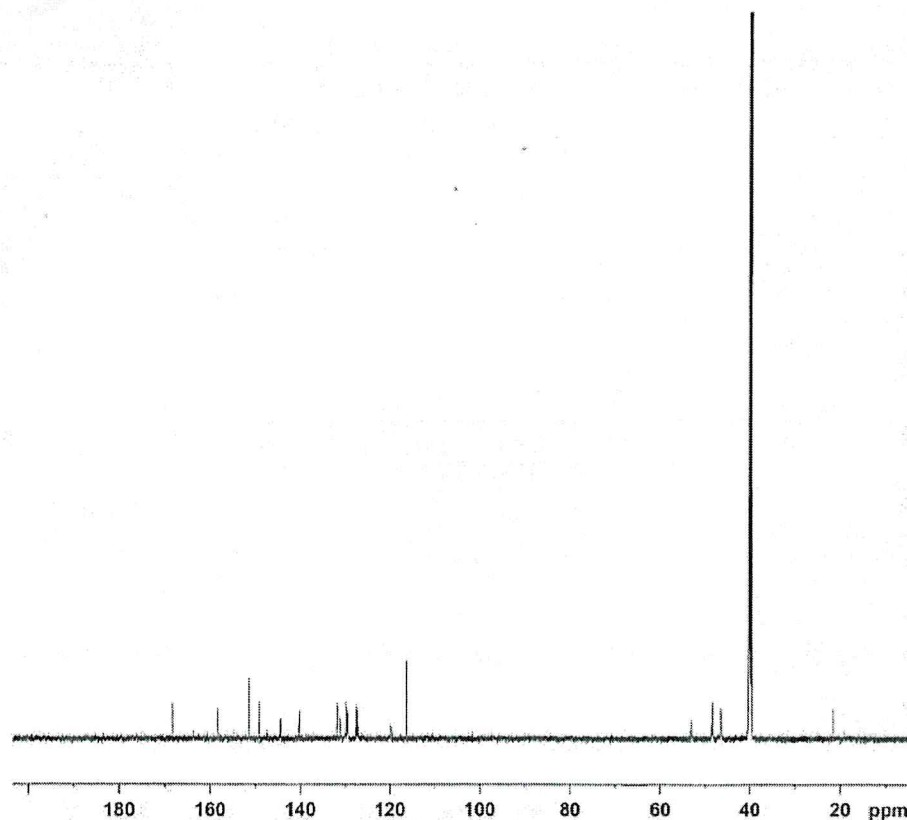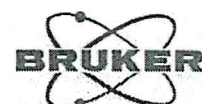

Current Data Parameters  
NAME O.C-PB4Met  
EXPNO 11  
PROCNO 1

F2 - Acquisition Parameters  
Date\_ 20140820  
Time 6.47  
INSTRUM spect  
PROBHD 5 mm PABBO BB/  
PULPROG zgpg30  
TD 65536  
SOLVENT DMSO  
NS 512  
DS 4  
SWH 36057.691 Hz  
FIDRES 0.550197 Hz  
AQ 0.9087659 sec  
RG 2050  
DM 13.867 usec  
DE 6.50 usec  
TE 297.0 K  
D1 2.00000000 sec  
D11 0.03000000 sec  
TDG 1

===== CHANNEL f1 =====  
SFO1 150.9178991 MHz  
NUC1 13C  
P1 10.50 usec  
PLW1 100.0000000 W

===== CHANNEL f2 =====  
SFO2 600.1324005 MHz  
NUC2 1H  
CPDPRG2 waltz16  
PCPD2 70.00 usec  
PLW2 25.0000000 W  
PLW12 0.56250000 W  
PLW13 0.27562001 W

F2 - Processing parameters  
SI 32768  
SF 150.9028090 MHz  
WDW EM  
SSB 0  
LB 1.00 Hz  
GB 0  
PC 1.40



### Data 9. Mass spectral analysis of compound 3

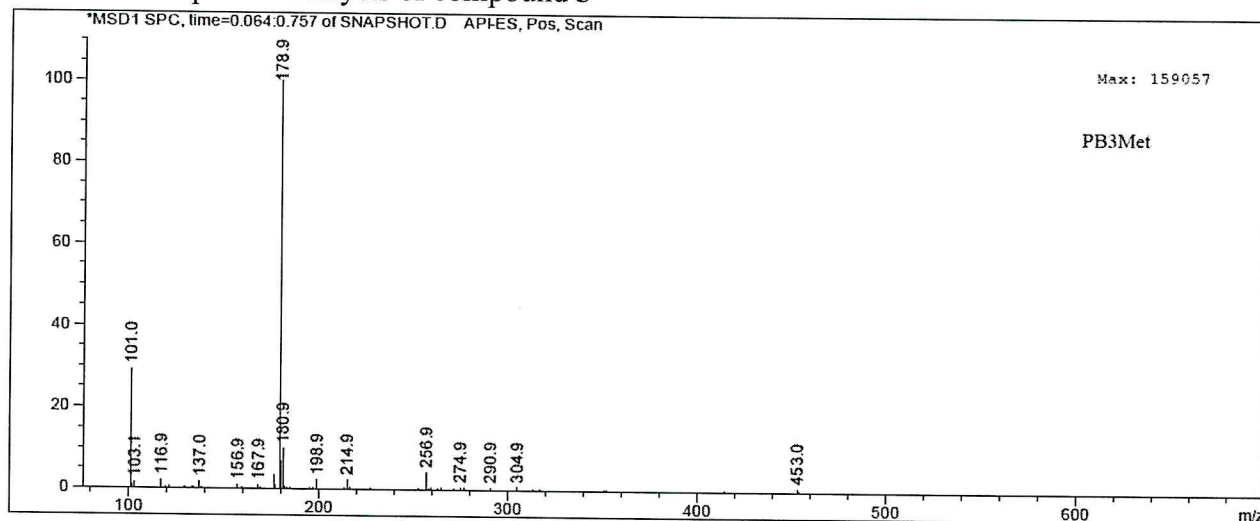

### Data 10. <sup>1</sup>H-NMR spectral analysis of compound 4

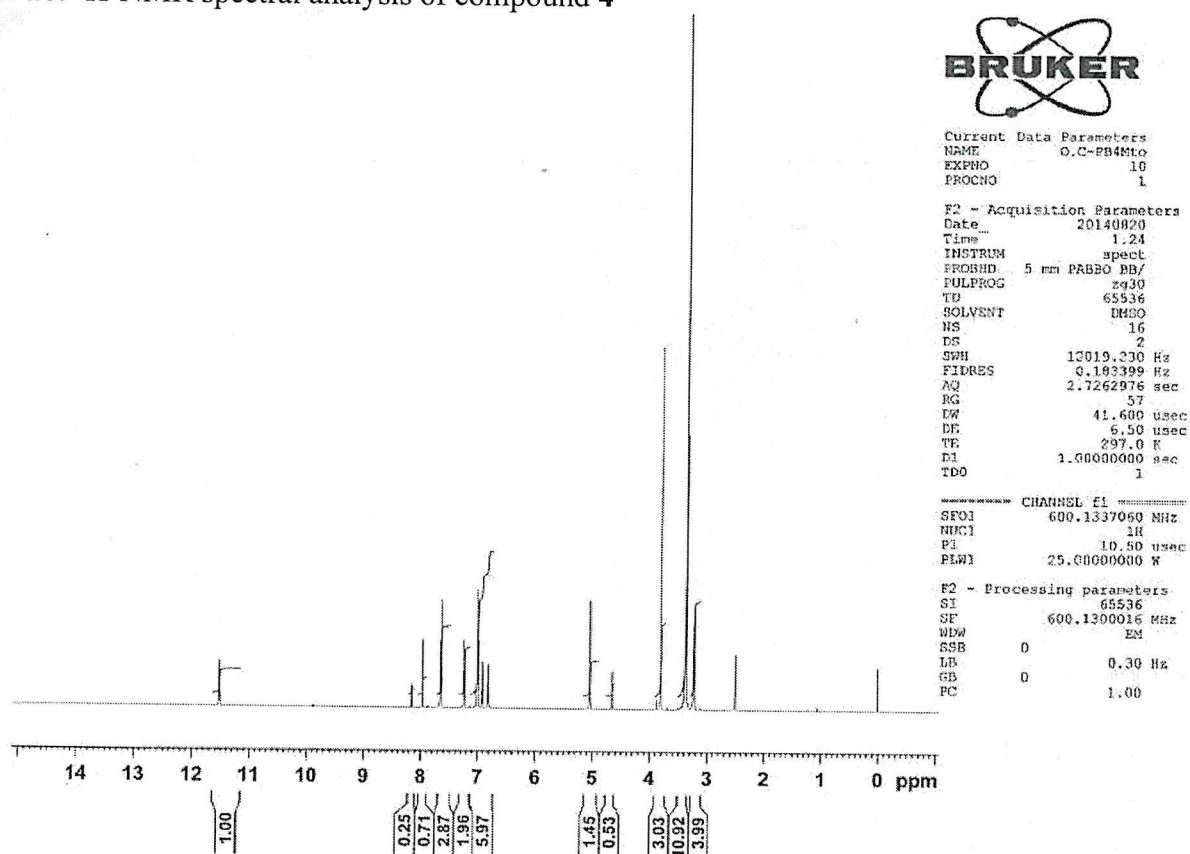

# Data 11. $^{13}\text{C}$ -NMR spectral analysis of compound 4

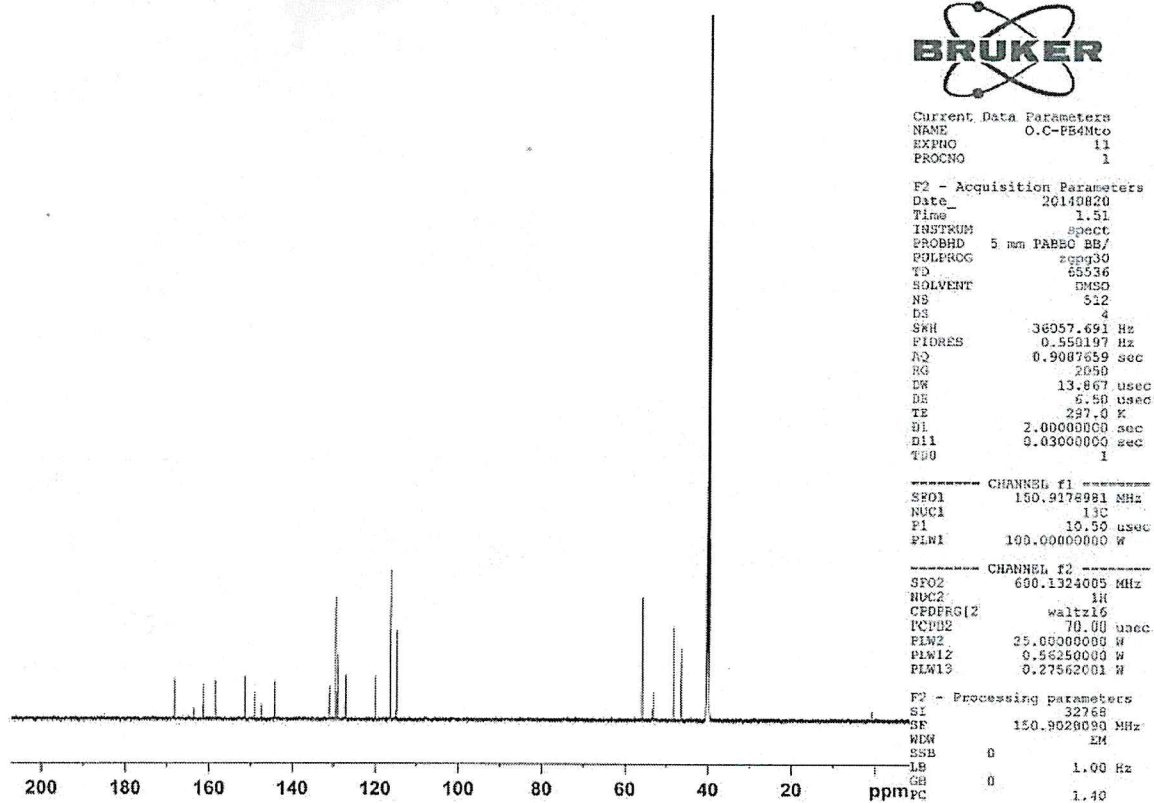

# Data 13. Mass spectral analysis of compound 4

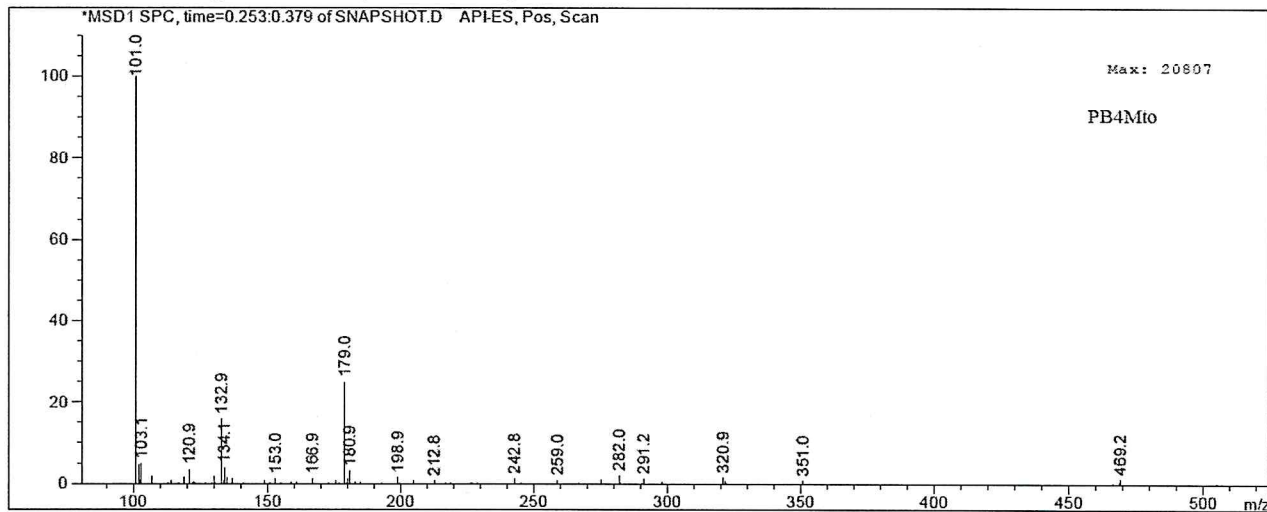

Data 14.  $^1\text{H}$ -NMR spectral analysis of compound 5

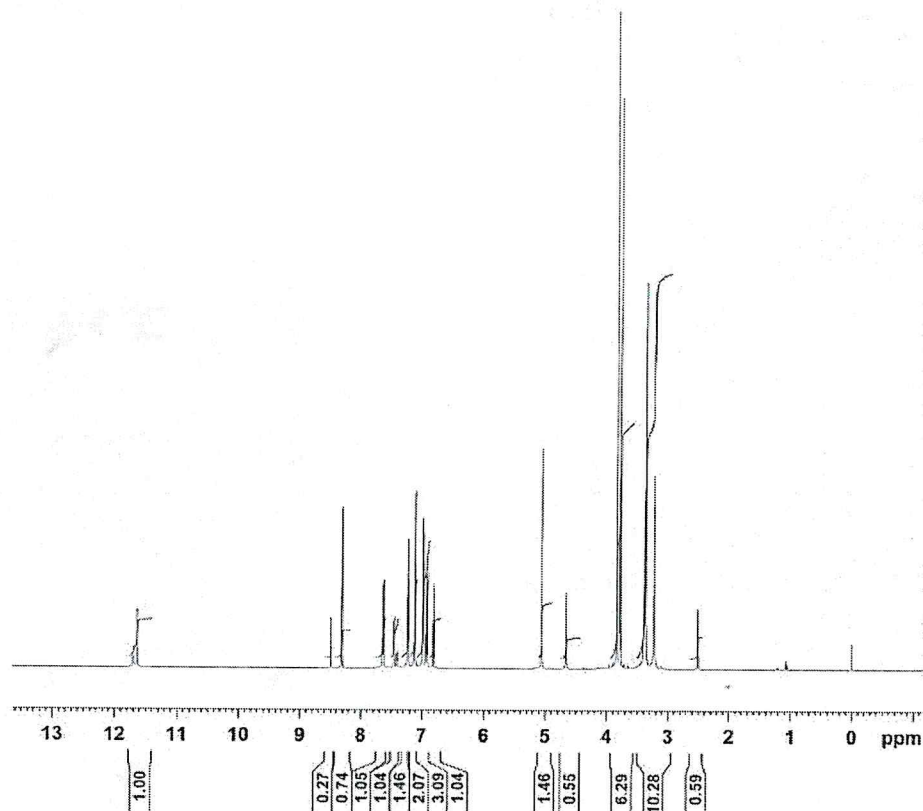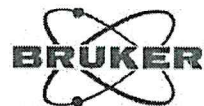

Current Data Parameters  
NAME O.C-PB23Mto  
EXPNO 10  
PROCNO 1

F2 - Acquisition Parameters  
Date\_ 20140820  
Time 1.54  
INSTRUM spect  
PROBHD 5 mm PABBO BB/  
PULPROG zg30  
TD 65536  
SOLVENT DMSO  
NS 16  
DS 2  
SWH 12019.230 Hz  
FIDRES 0.183399 Hz  
AQ 2.7262976 sec  
RG 32  
DAW 41.600 usec  
DE 6.50 usec  
TE 297.0 K  
D1 1.00000000 sec  
TDO 1

===== CHANNEL f1 =====  
SF01 600.1337060 MHz  
NUC1 1H  
P1 10.50 usec  
PLW1 25.00000000 W

F2 - Processing parameters  
SI 65536  
SF 600.1300007 MHz  
WDW EM  
SSB 0  
LB 0.30 Hz  
GB 0  
PC 1.00

Data 15.  $^{13}\text{C}$ -NMR spectral analysis of compound 5

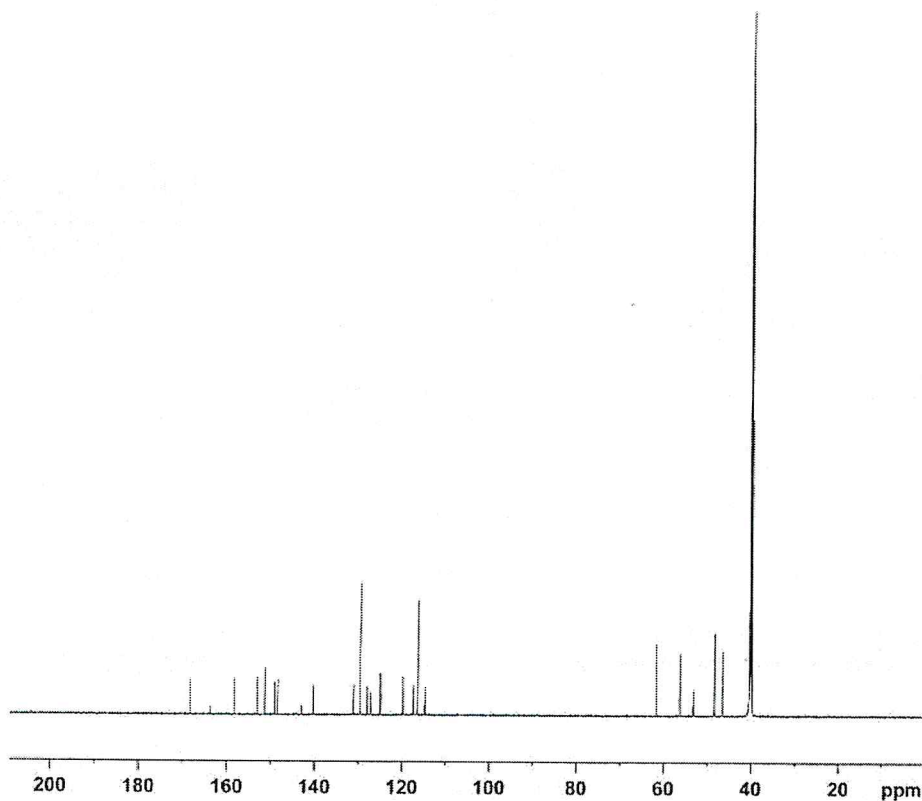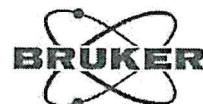

Current Data Parameters  
NAME O.C-PB23Mto  
EXPNO 11  
PROCNO 1

F2 - Acquisition Parameters  
Date\_ 20140820  
Time 2.21  
INSTRUM spect  
PROBHD 5 mm PABBO BB/  
PULPROG zgpg30  
TD 65536  
SOLVENT DMSO  
NS 512  
DS 4  
SWH 36057.691 Hz  
FIDRES 0.550197 Hz  
AQ 0.9007659 sec  
RG 2050  
DAW 13.967 usec  
DE 5.50 usec  
TE 297.0 K  
D1 2.00000000 sec  
D11 0.03000000 sec  
TDO 1

===== CHANNEL f1 =====  
SF01 150.9178901 MHz  
NUC1 13C  
P1 10.50 usec  
PLW1 100.00000060 W

===== CHANNEL f2 =====  
SF02 600.1324005 MHz  
NUC2 1H  
CPDPRG12 waltz16  
PCPD2 70.00 usec  
PLW2 25.00000000 W  
PLW12 0.56250060 W  
PLW13 0.27562001 W

F2 - Processing parameters  
SI 32768  
SF 150.9028090 MHz  
WDW EM  
SSB 0  
LB 1.00 Hz  
GB 0  
PC 1.40

# Data 16. Mass spectral analysis of compound 5

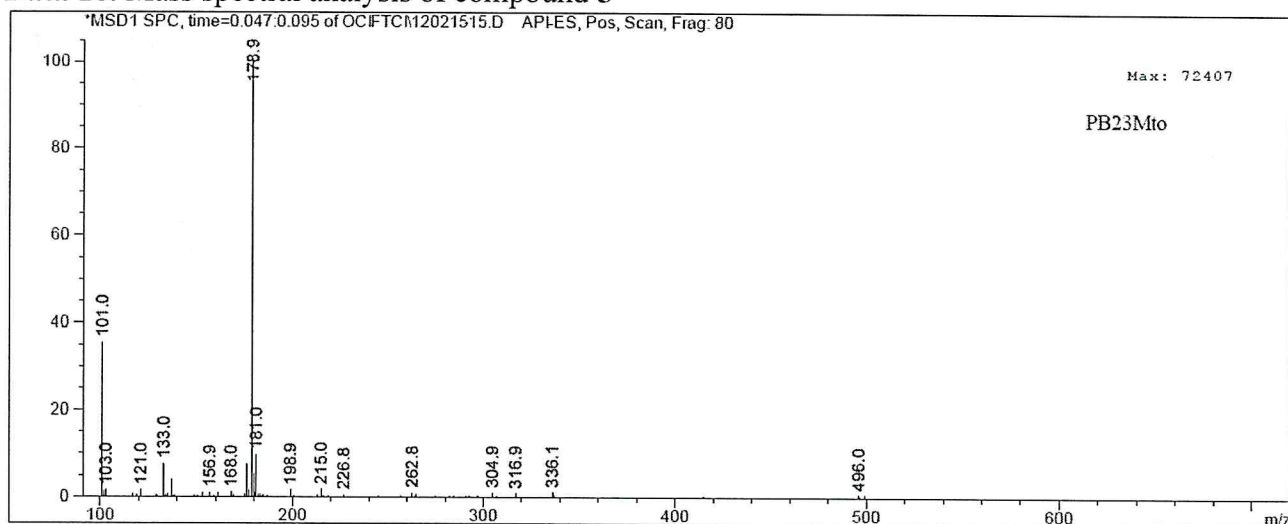

# Data 17. <sup>1</sup>H-NMR spectral analysis of compound 6

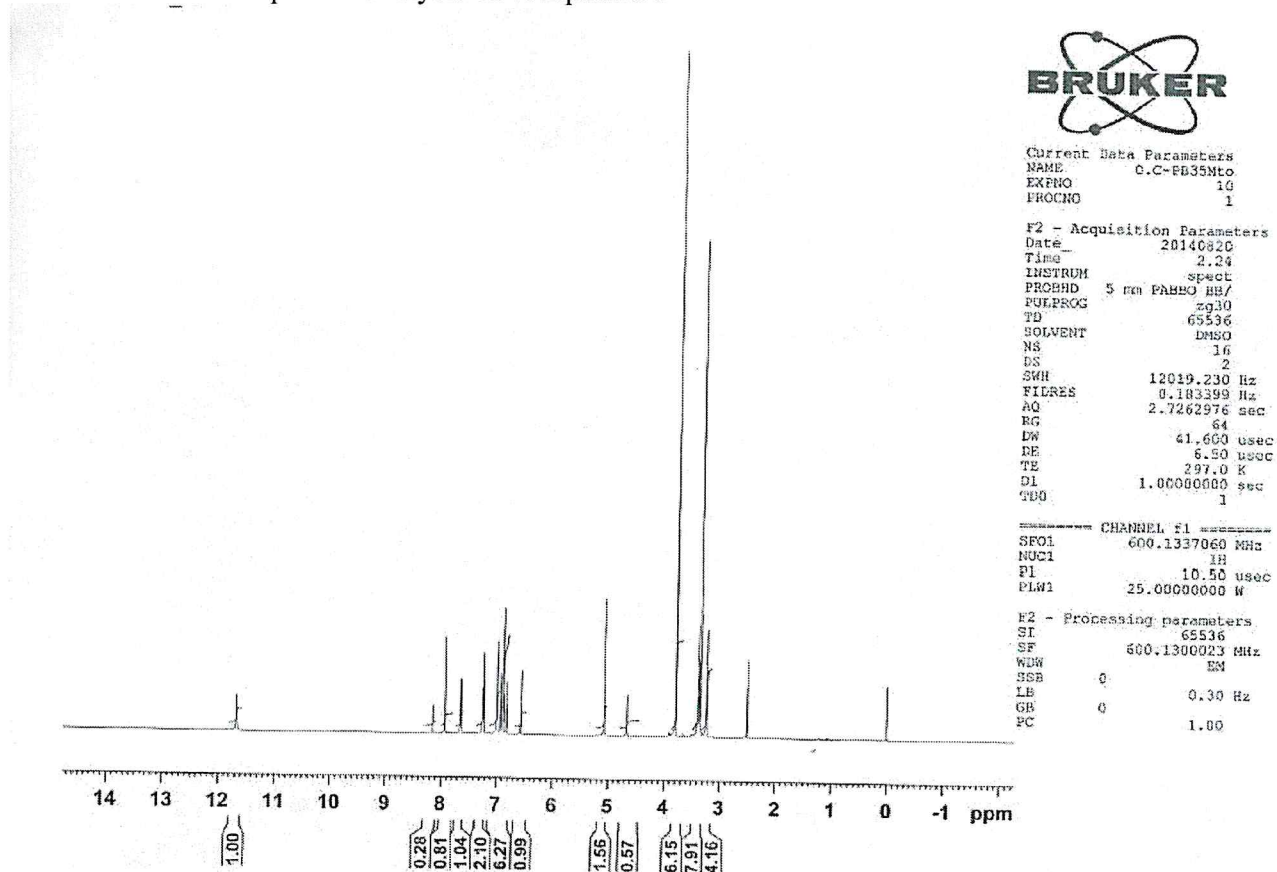

**Data 18.**  $^{13}\text{C}$ -NMR spectral analysis of compound 6

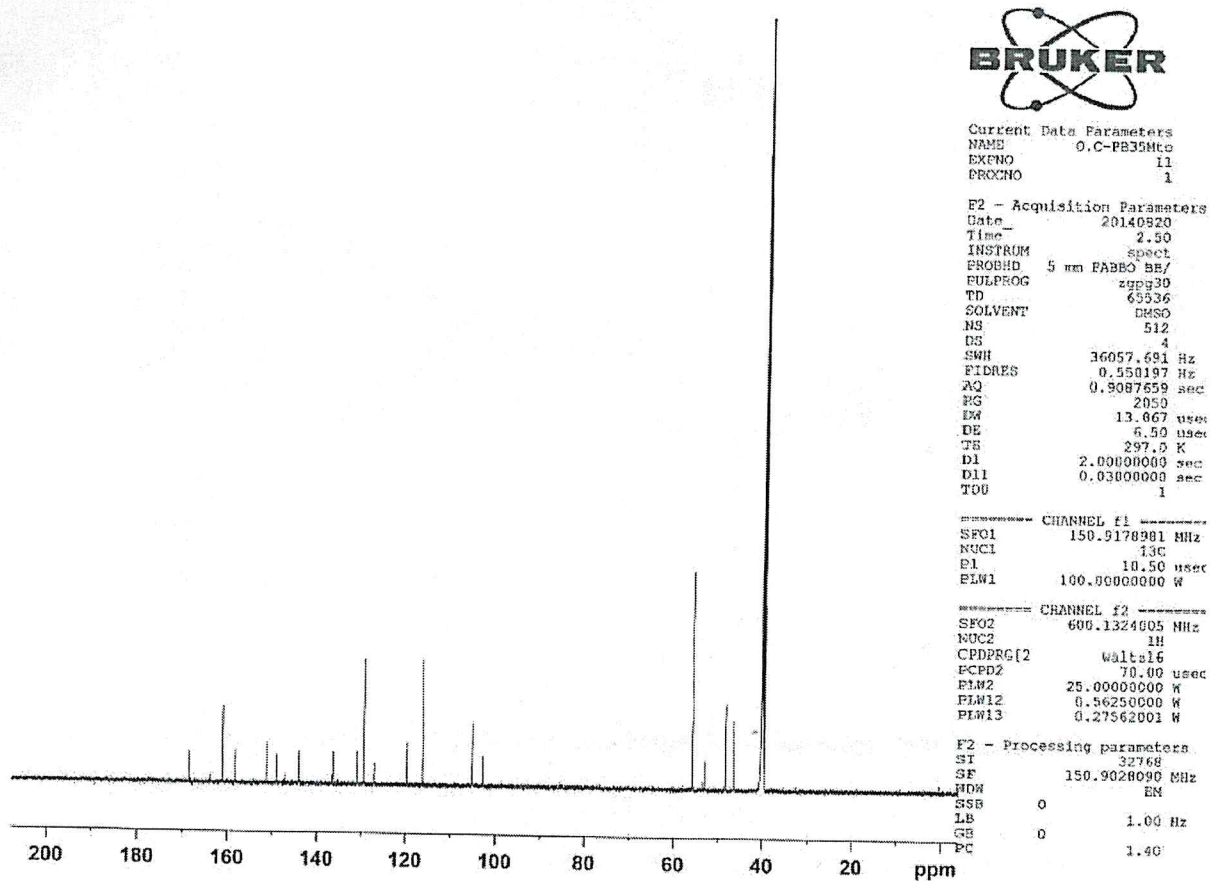

**Data 19.** Mass spectral analysis of compound 6

**Qualitative Analysis Report**

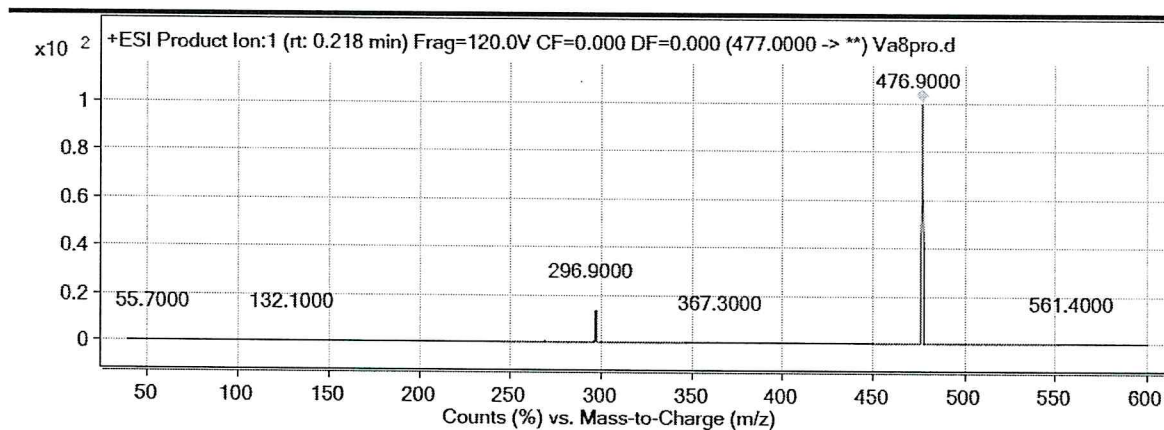

**Peak List**

| m/z   | z | Abund     |
|-------|---|-----------|
| 90.5  | 2 | 56.5      |
| 119.7 | 2 | 55.8      |
| 132.1 |   | 82.58     |
| 149.5 | 2 | 73.86     |
| 241.6 | 2 | 66.2      |
| 268.9 |   | 1360.48   |
| 296.9 |   | 23633.5   |
| 458.8 |   | 59.6      |
| 475.6 |   | 278.38    |
| 476.9 |   | 174022.17 |



Data 20.  $^1\text{H}$ -NMR spectral analysis of compound 7

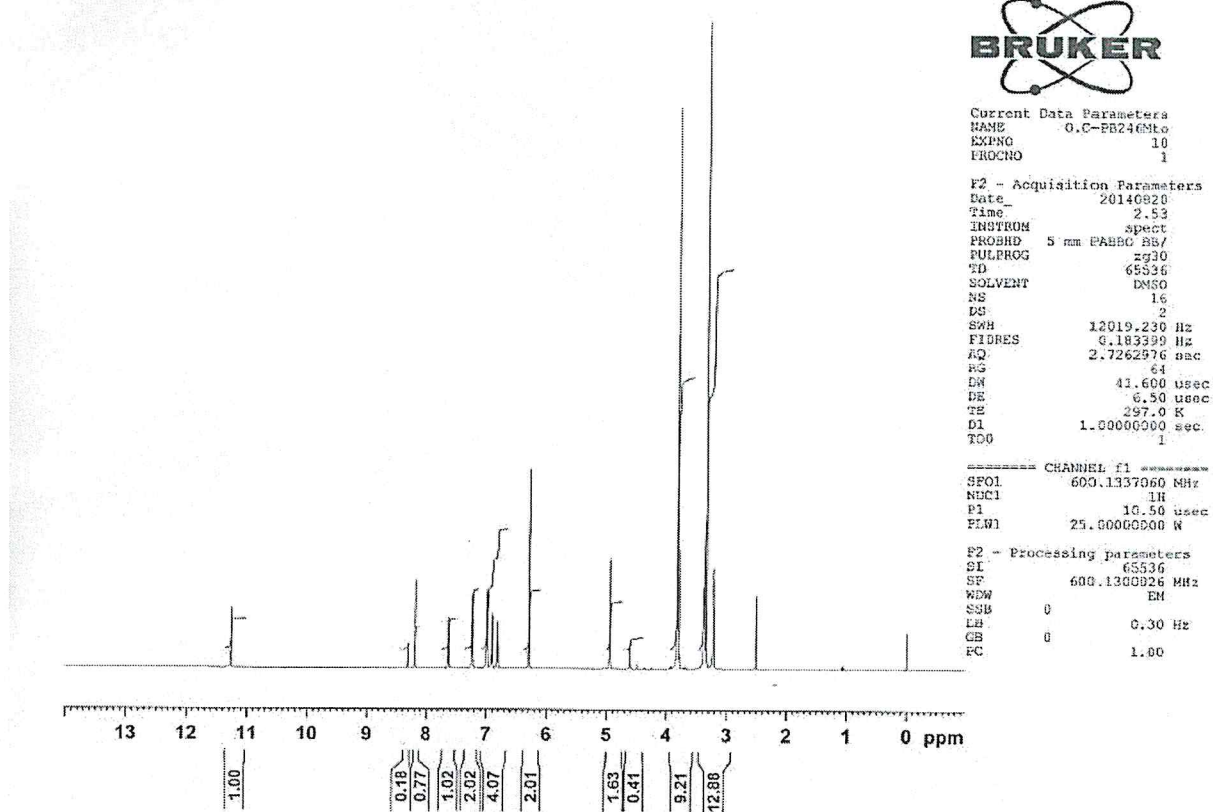

Data 21.  $^{13}\text{C}$ -NMR spectral analysis of compound 7

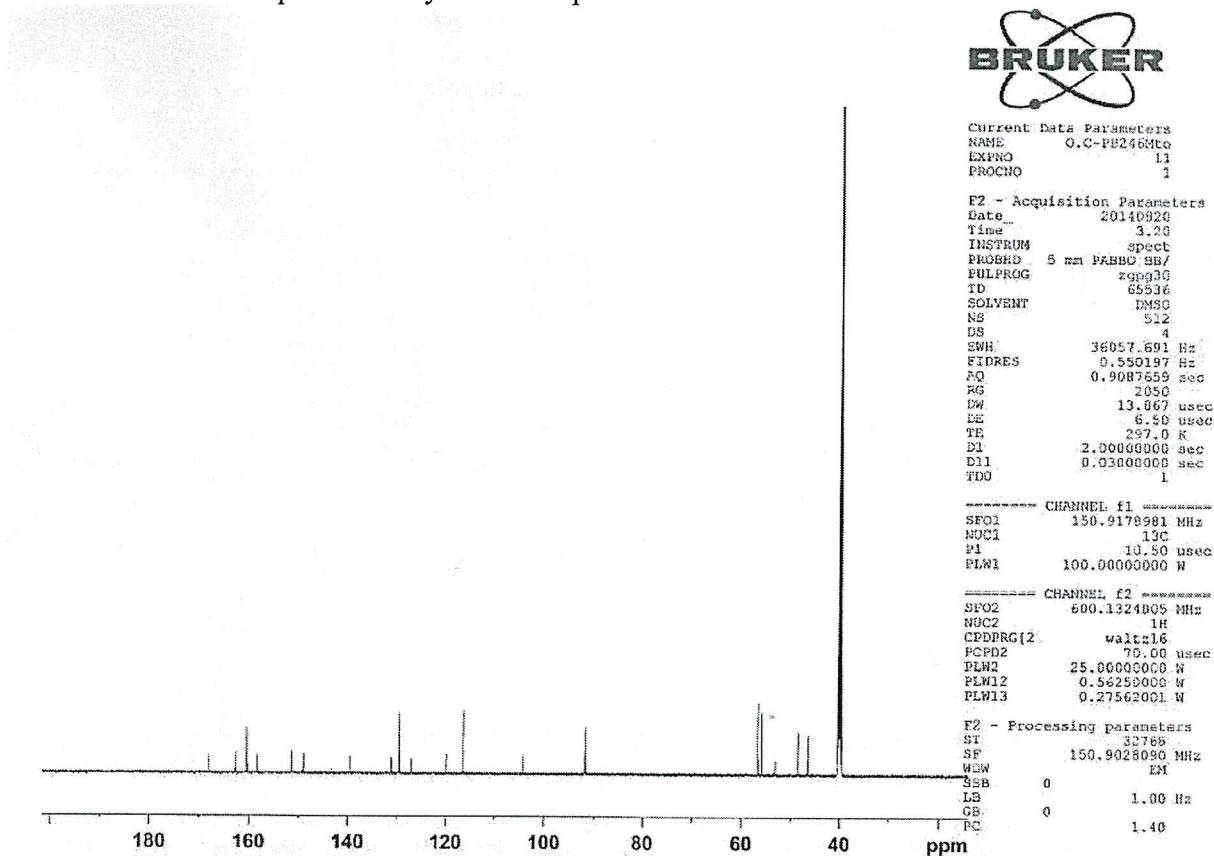

## Data 22. Mass spectral analysis of compound 7

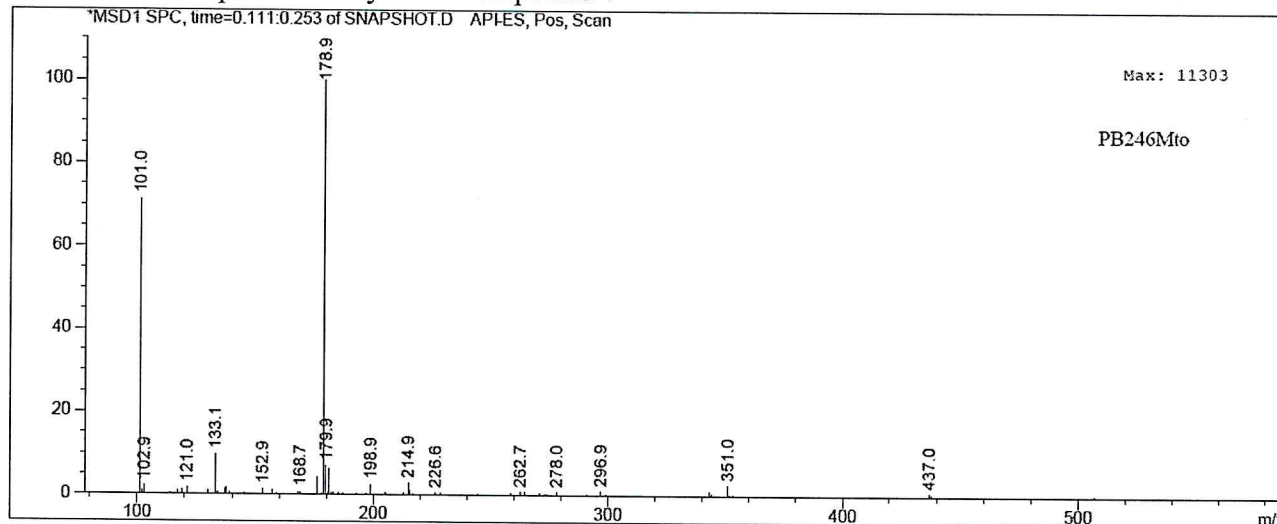

## Data 23. <sup>1</sup>H-NMR spectral analysis of compound 8

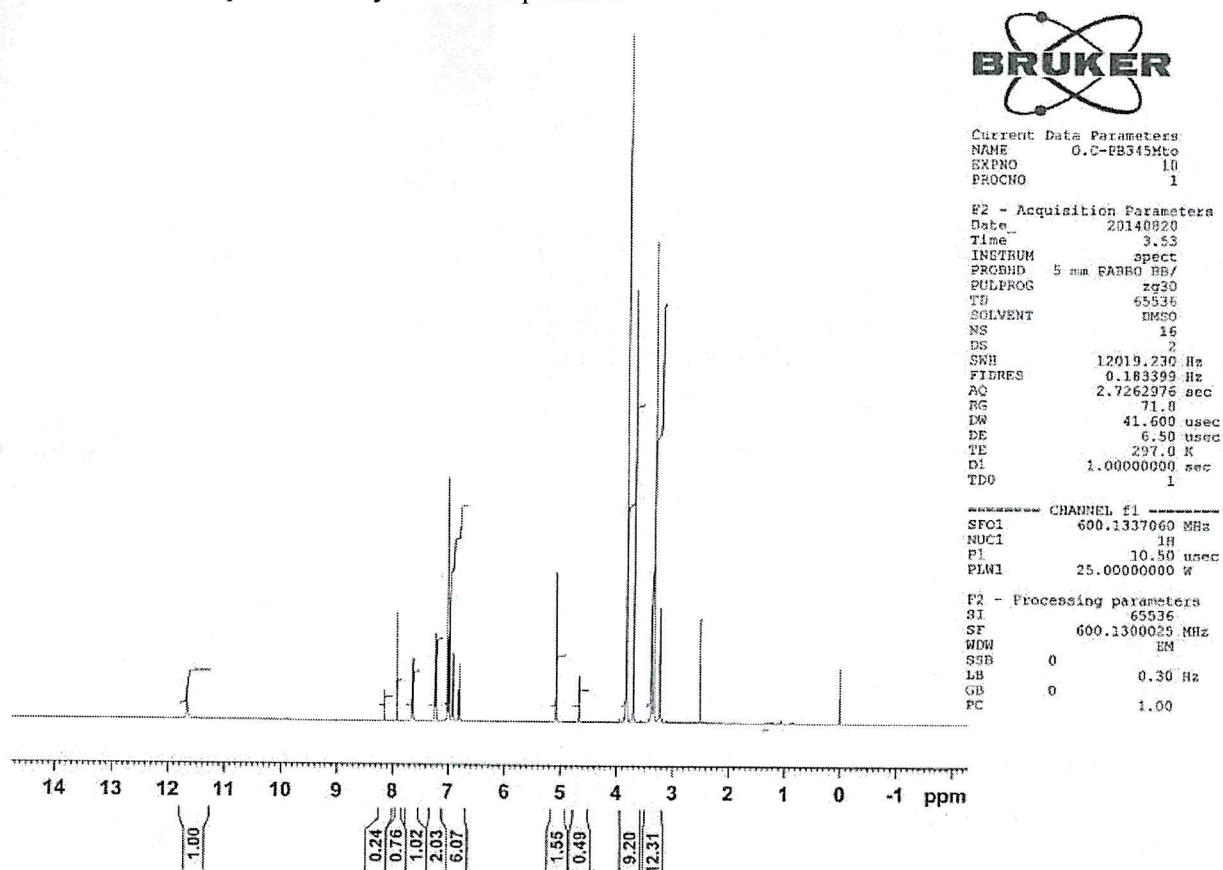

**Data 24.**  $^{13}\text{C}$ -NMR spectral analysis of compound 8

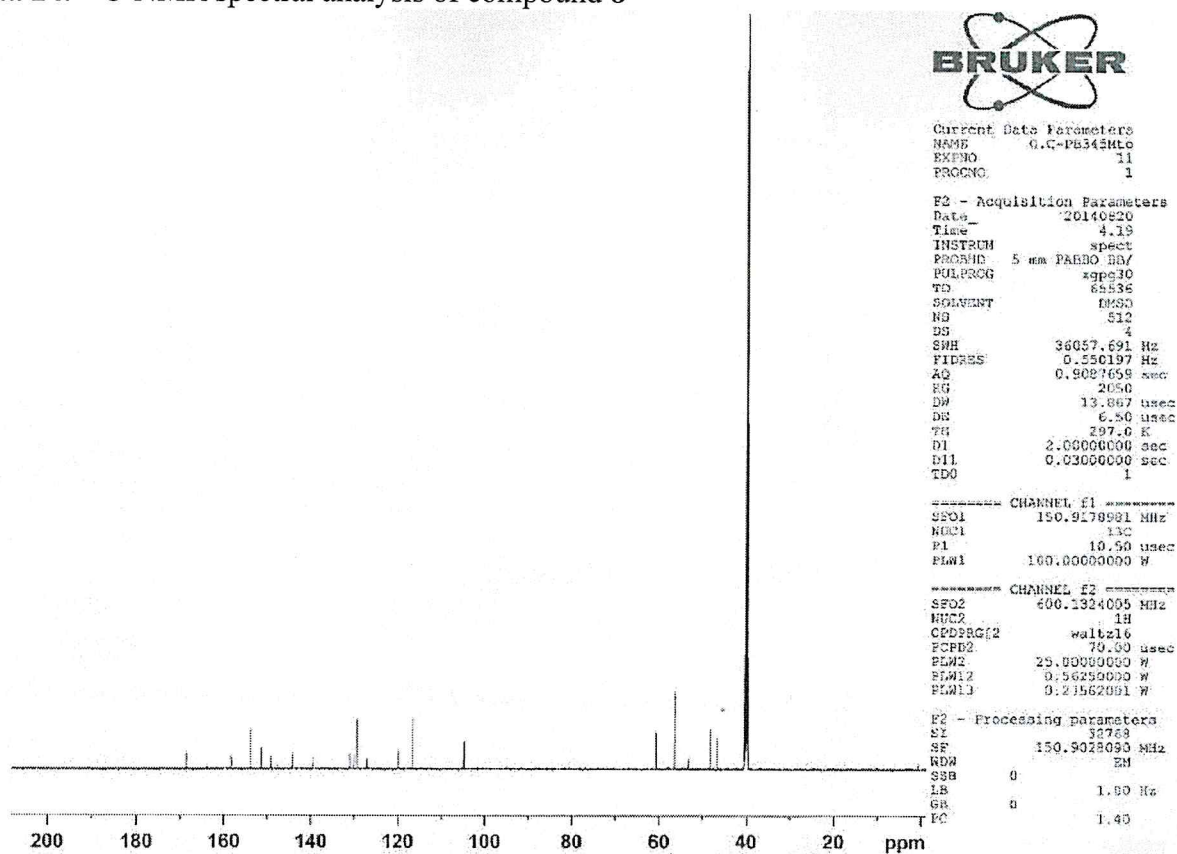

**Data 25.** Mass spectral analysis of compound 8

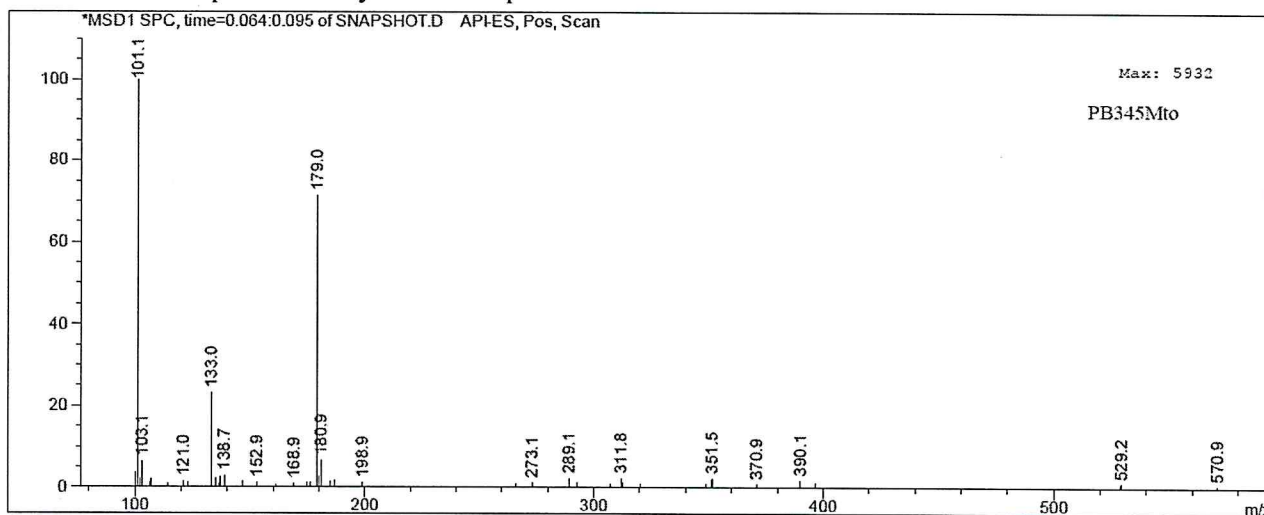

Data 26.  $^1\text{H}$ -NMR spectral analysis of compound 9

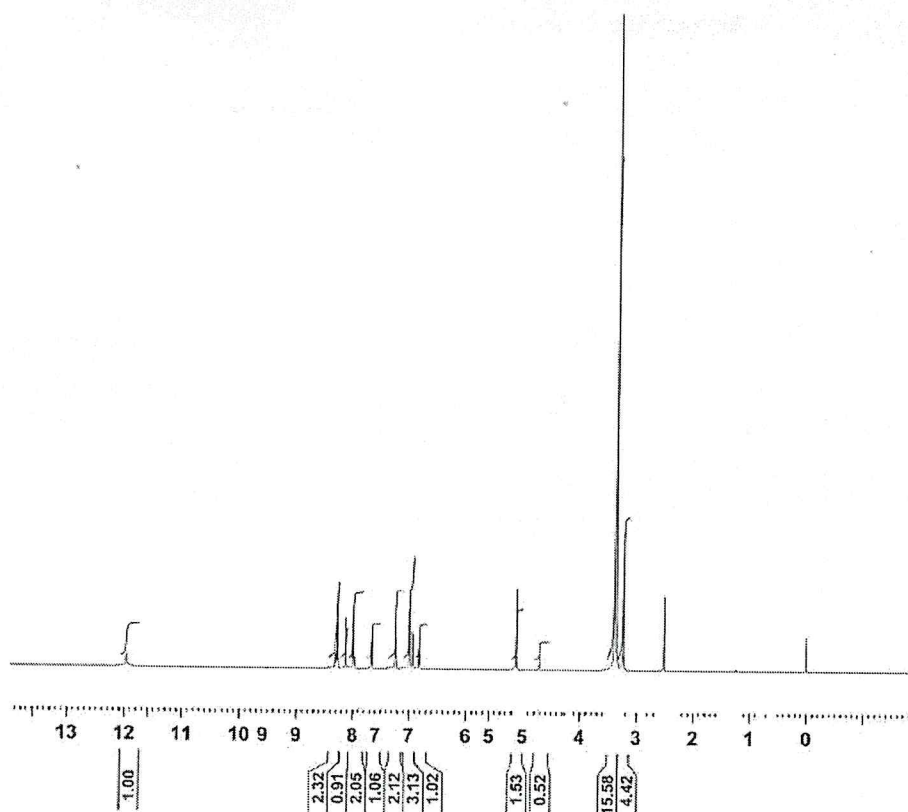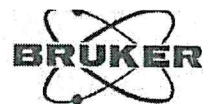

Current Data Parameters  
NAME O.C-PBNO  
EXPNO 10  
PROCNO 1

F2 - Acquisition Parameters  
Date\_ 20140820  
Time 5.51  
INSTRUM spect  
PROBHD 5 mm PABBO BB/  
PULPROG zg30  
TD 65536  
SOLVENT DMSO  
NS 16  
DS 2  
SWH 12019.230 Hz  
FIDRES 0.183399 Hz  
AQ 2.7262976 sec  
RG 80.6  
DW 41.600 usec  
DE 6.50 usec  
TE 297.0 K  
D1 1.00000000 sec  
TD0 1

CHANNEL f1  
SF01 600.1337060 MHz  
NUC1 1H  
P1 10.50 usec  
PLW1 25.00000000 W

F2 - Processing parameters  
SI 65536  
SF 600.1300015 MHz  
WDW EM  
SSB 0  
LB 0.30 Hz  
GB 0  
PC 1.00

Data 27.  $^{13}\text{C}$ -NMR spectral analysis of compound 9

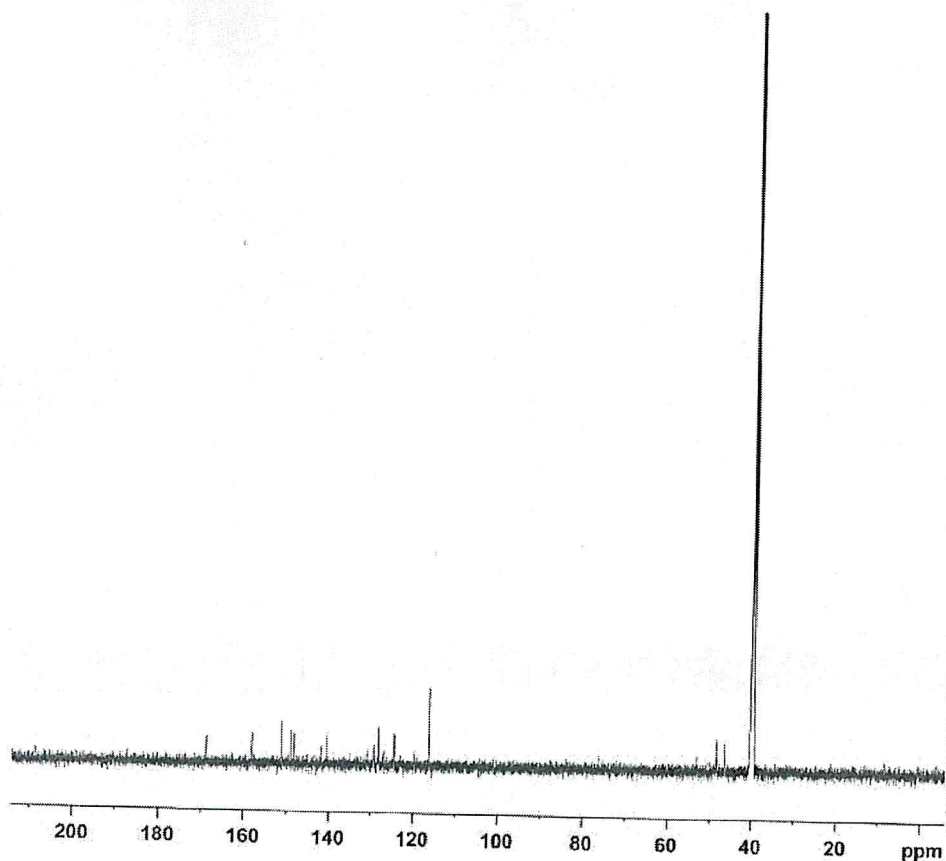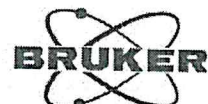

Current Data Parameters  
NAME O.C-PBNO  
EXPNO 11  
PROCNO 1

F2 - Acquisition Parameters  
Date\_ 20140820  
Time 6.17  
INSTRUM spect  
PROBHD 5 mm PABBO BB/  
PULPROG zgpg30  
TD 65536  
SOLVENT DMSO  
NS 512  
DS 4  
SWH 36057.691 Hz  
FIDRES 0.350197 Hz  
AQ 0.9987659 sec  
RG 2050  
DW 13.867 usec  
DE 6.50 usec  
TE 297.0 K  
D1 2.00000000 sec  
D11 0.03000000 sec  
TD0 1

CHANNEL f1  
SF01 150.9178981 MHz  
NUC1 13C  
P1 10.50 usec  
PLW1 100.00000000 W

CHANNEL f2  
SF02 600.1324005 MHz  
NUC2 1H  
PCPDG12 waltz16  
PCPD2 70.00 usec  
PLW2 25.00000000 W  
PLW12 0.56250000 W  
PLW13 0.27562001 W

F2 - Processing parameters  
SI 32768  
SF 150.9028000 MHz  
WDW EM  
SSB 0  
LB 1.00 Hz  
GB 0  
PC 1.40

**Data 28. Mass spectral analysis of compound 9**  
**Qualitative Analysis Report**

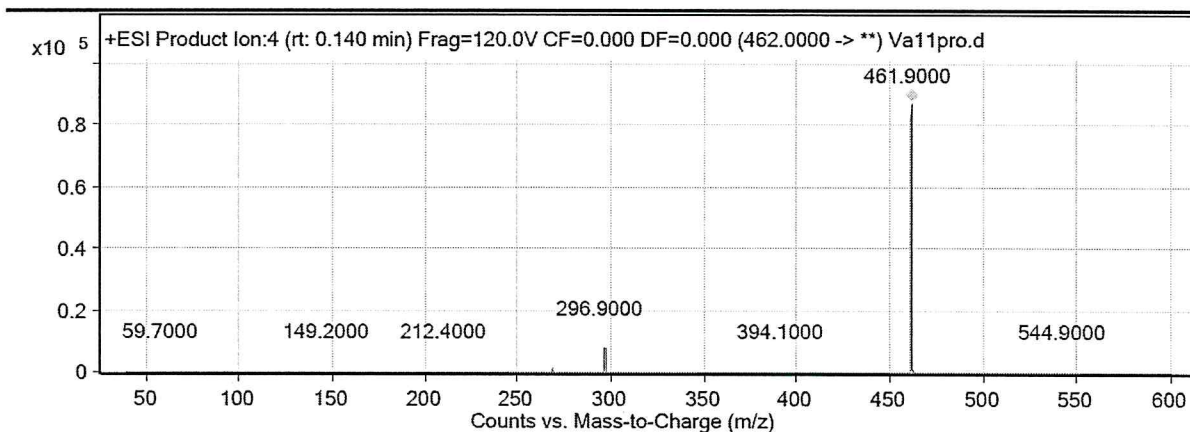

**Peak List**

| m/z   | z | Abund    |
|-------|---|----------|
| 43.7  | 2 | 54.98    |
| 59.7  | 2 | 58.34    |
| 109.2 |   | 54.48    |
| 118.6 | 2 | 54.78    |
| 149.2 |   | 59.66    |
| 212.4 | 2 | 54.12    |
| 268.9 |   | 884.76   |
| 296.9 |   | 7646.08  |
| 460.1 |   | 63.06    |
| 461.9 |   | 87040.38 |

**Data 29. <sup>1</sup>H-NMR spectral analysis of compound 10**

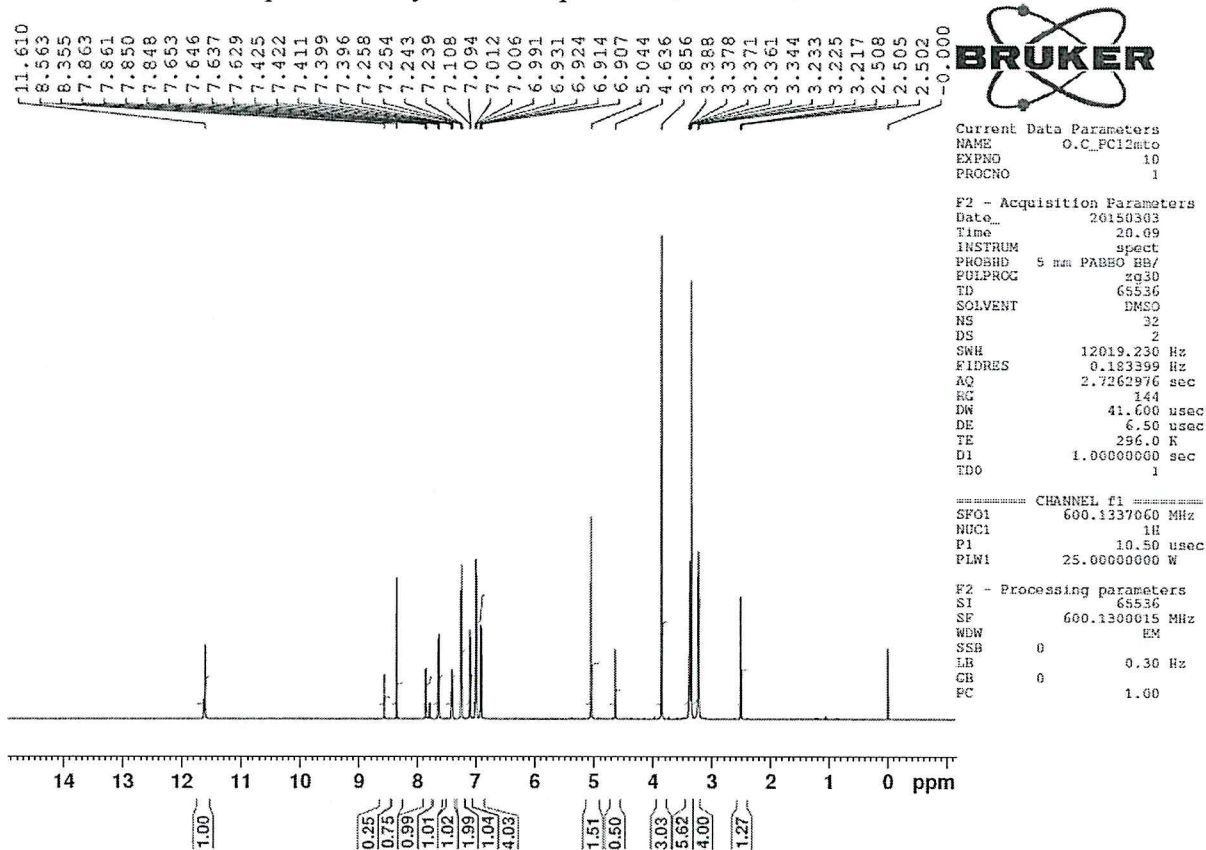



# Data 30. $^{13}\text{C}$ -NMR spectral analysis of compound 10

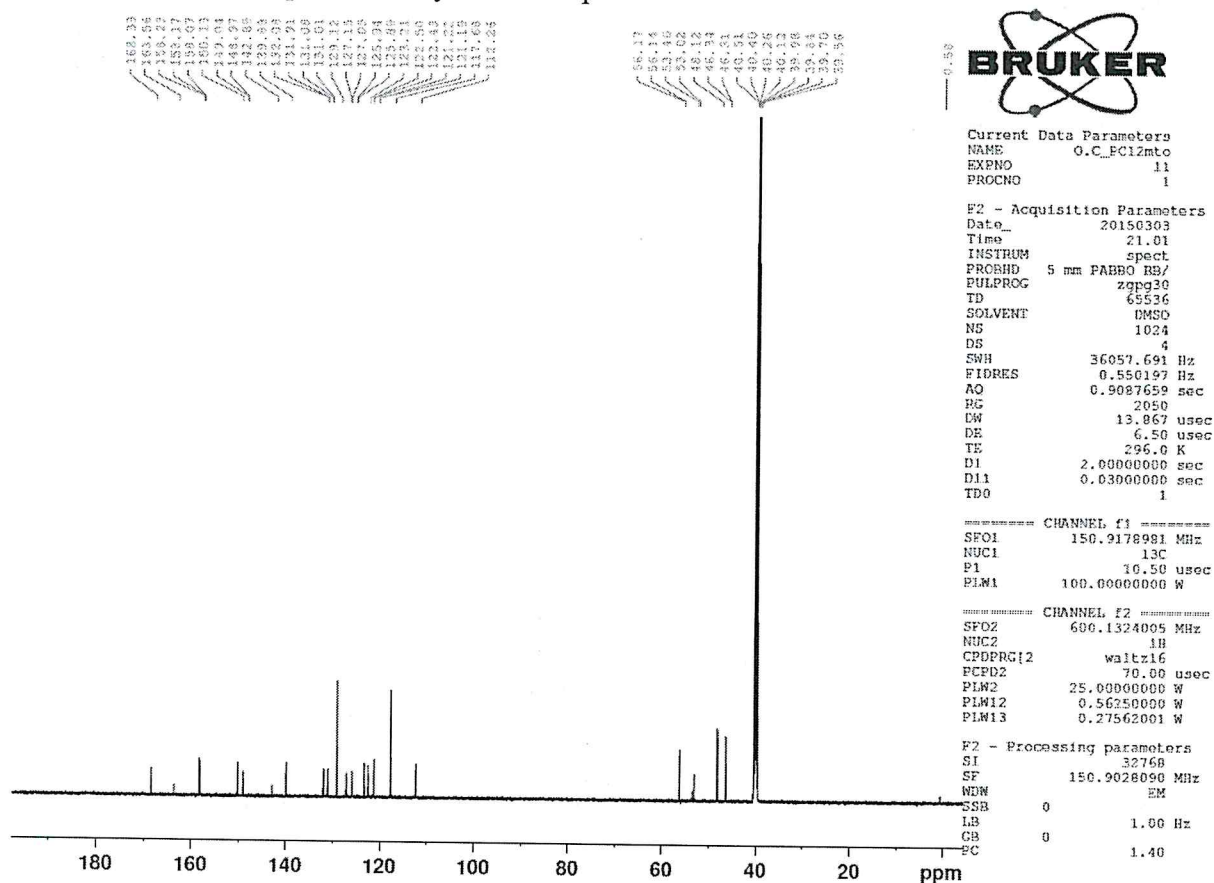

## Data 31. Mass spectral analysis of compound 10

### Qualitative Analysis Report

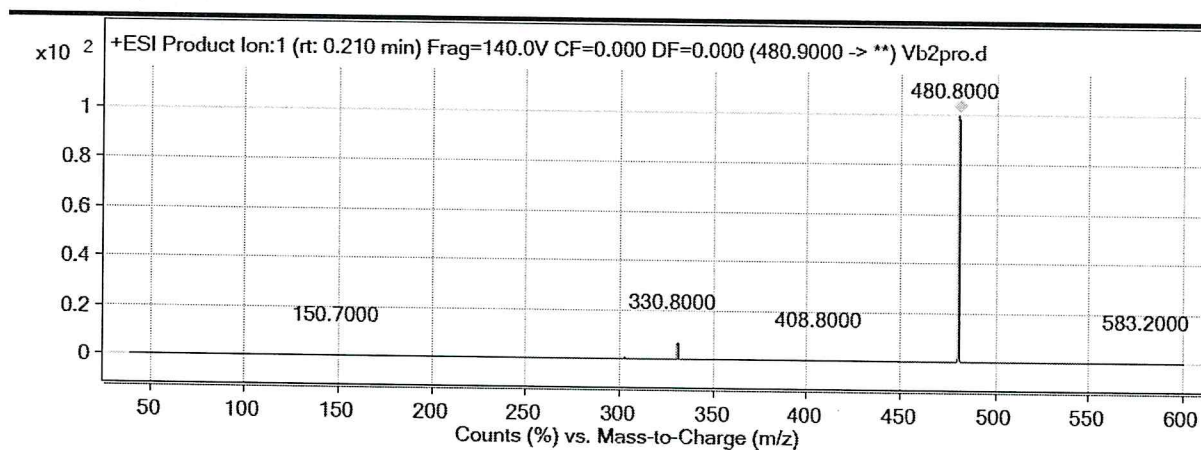

#### Peak List

| m/z   | z | Abund    |
|-------|---|----------|
| 149.5 | 2 | 54.76    |
| 150.7 | 2 | 94.6     |
| 179.9 |   | 54.5     |
| 180.6 | 2 | 54.62    |
| 190.7 | 2 | 93.92    |
| 290.4 | 2 | 56.7     |
| 302.7 | 2 | 446.1    |
| 328.6 | 2 | 54.6     |
| 330.8 |   | 5004.22  |
| 480.8 |   | 76619.34 |

# Data 32. <sup>1</sup>H-NMR spectral analysis of compound 11

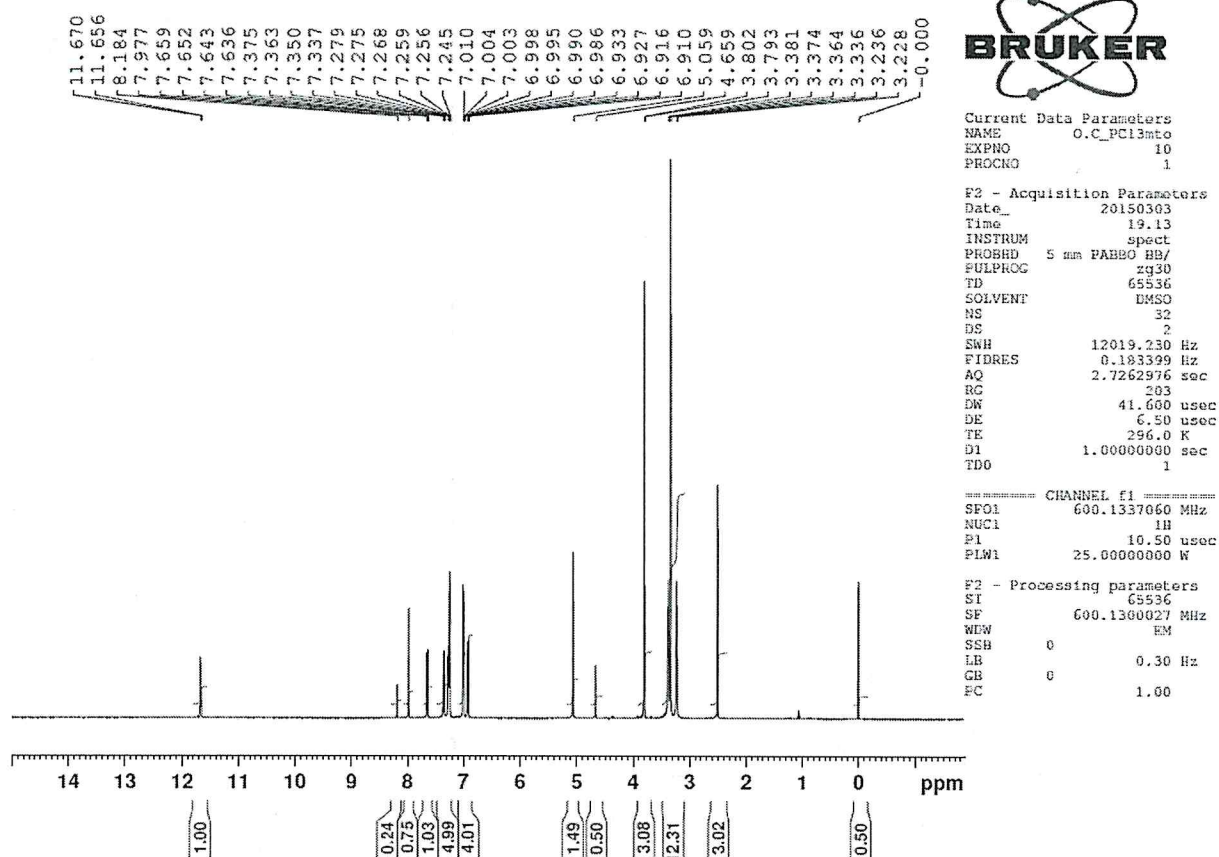

# Data 33. <sup>13</sup>C-NMR spectral analysis of compound 11

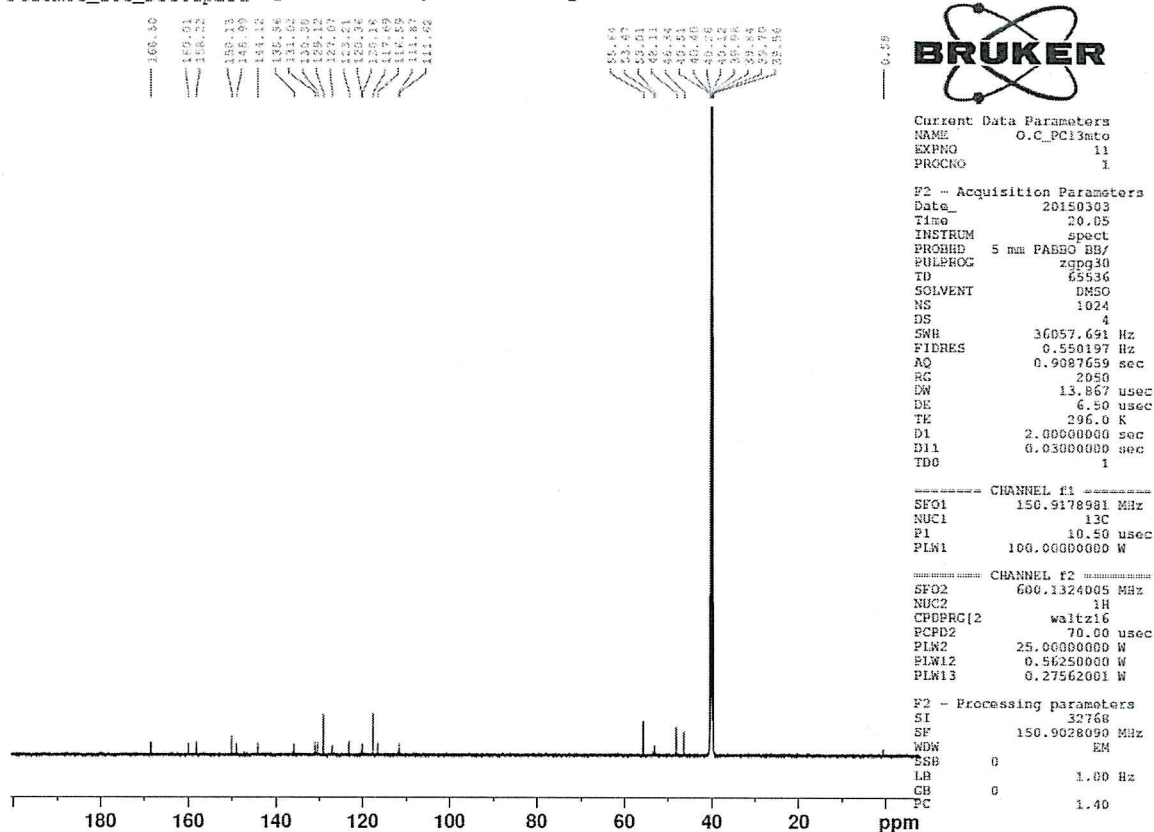

# Data 34. Mass spectral analysis of compound 11

## Qualitative Analysis Report

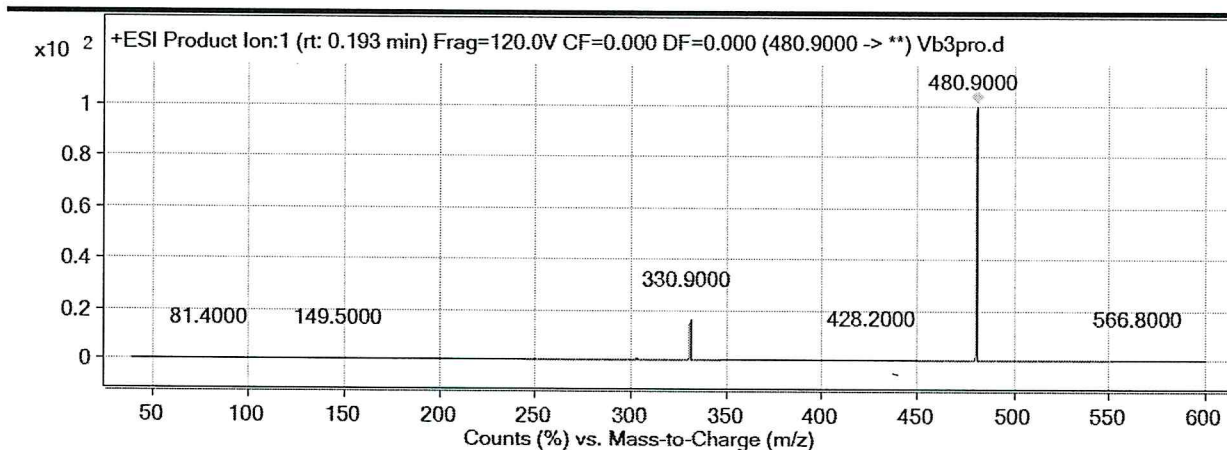

### Peak List

| m/z   | z | Abund    |
|-------|---|----------|
| 81.4  | 2 | 59.4     |
| 131.8 |   | 53.64    |
| 138.3 | 2 | 60.9     |
| 149.5 | 2 | 63.62    |
| 165.5 | 2 | 58.1     |
| 189.9 |   | 54.7     |
| 274.2 |   | 56.72    |
| 302.7 | 2 | 540.44   |
| 330.9 |   | 10467.06 |
| 480.9 |   | 67117.24 |

# Data 35. <sup>1</sup>H-NMR spectral analysis of compound 12

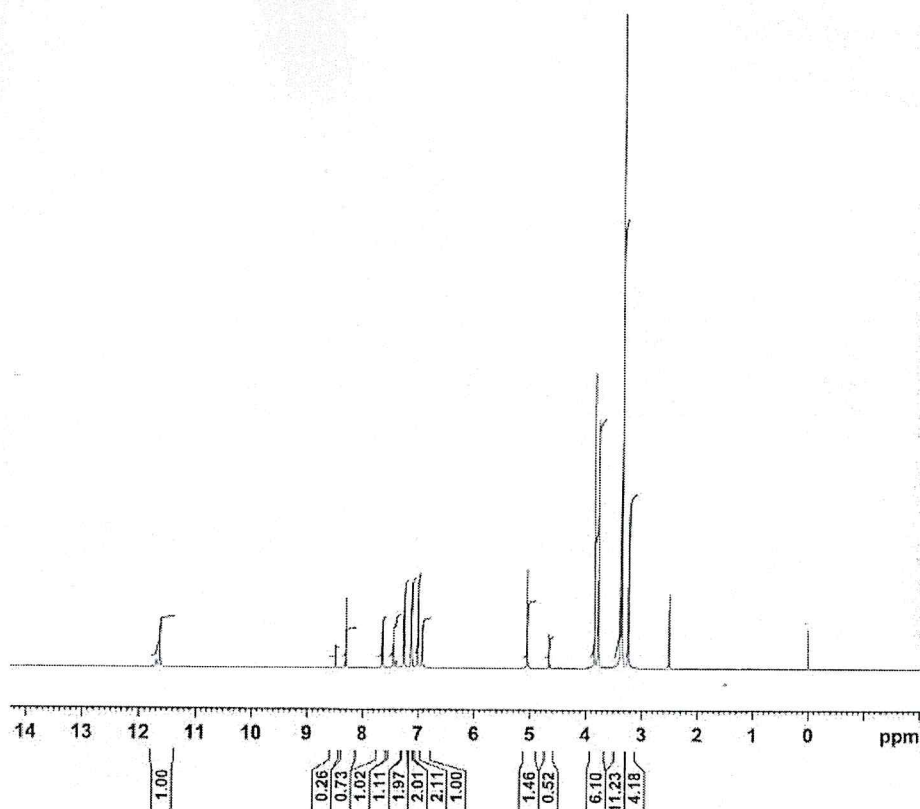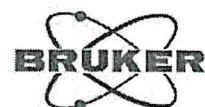

Current Data Parameters  
NAME 0.8-PC123Mto  
EXPNO 10  
PROCNO 1

F2 - Acquisition Parameters  
Date\_ 20140819  
Time 23.56  
INSTRUM spect  
PROBHD 5 mm PABBO BB/  
PULPROG zg30  
TD 65536  
SOLVENT DMSO  
NS 16  
DS 2  
SWH 12019.230 Hz  
FIDRES 0.183399 Hz  
AQ 2.7262976 sec  
RG 71.8  
RW 41.600 usec  
DE 6.50 usec  
TE 297.0 K  
D1 1.00000000 sec  
TD0 1

===== CHANNEL f1 =====  
SFO1 600.1337060 MHz  
NUC1 1H  
P1 10.50 usec  
PLW1 25.0000000 W

F2 - Processing parameters  
SI 65536  
SF 600.1300017 MHz  
WDW EM  
SSS 0  
LB 0.30 Hz  
GB 0  
PC 1.00

**Data 36.**  $^{13}\text{C}$ -NMR spectral analysis of compound 12

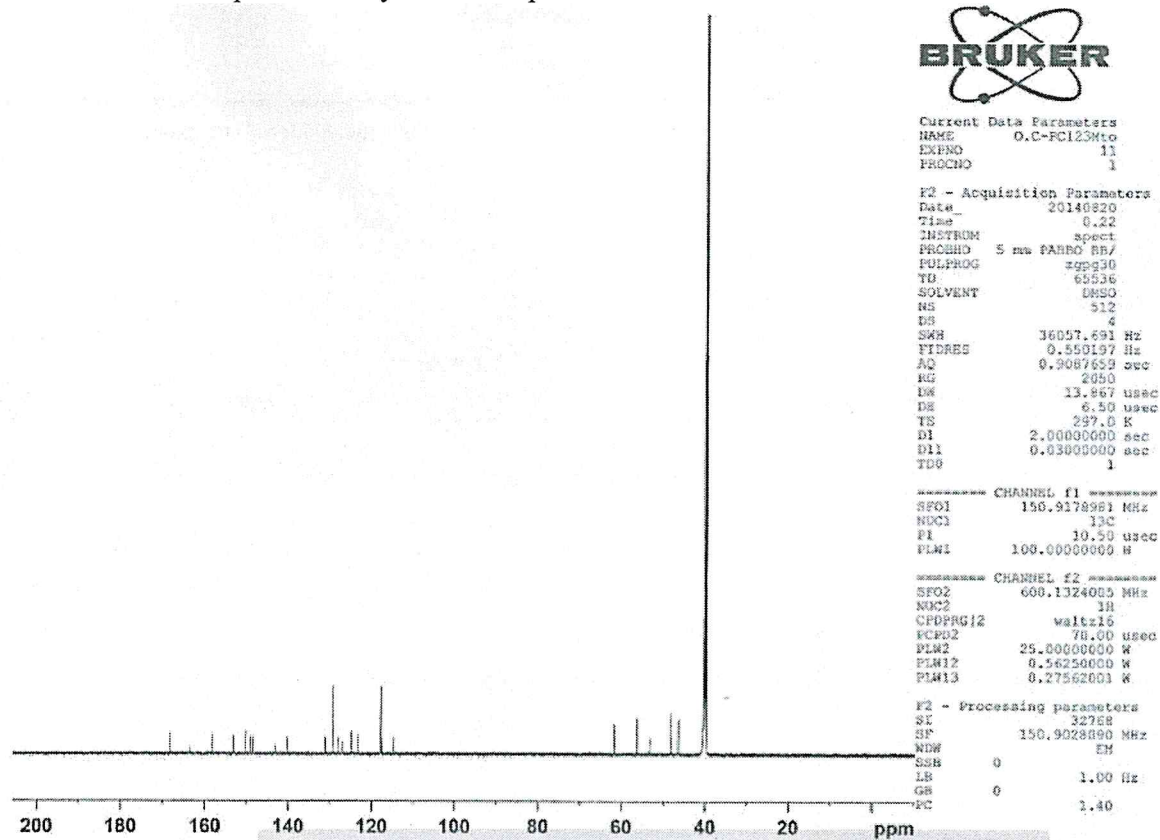

**Data 37.** Mass spectral analysis of compound 12

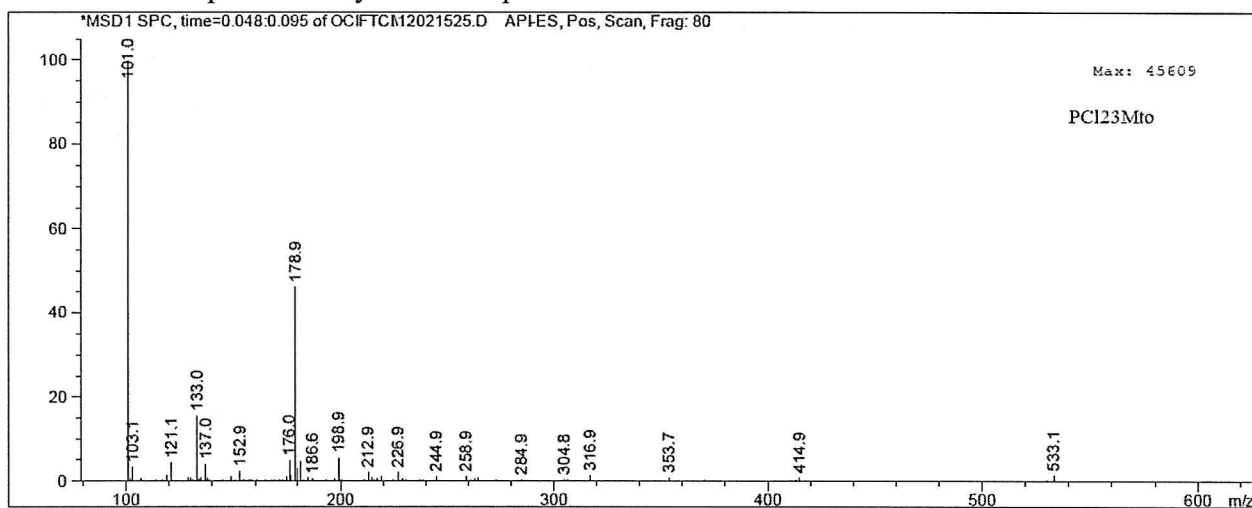

**Data 38.  $^1\text{H}$ -NMR spectral analysis of compound 13**

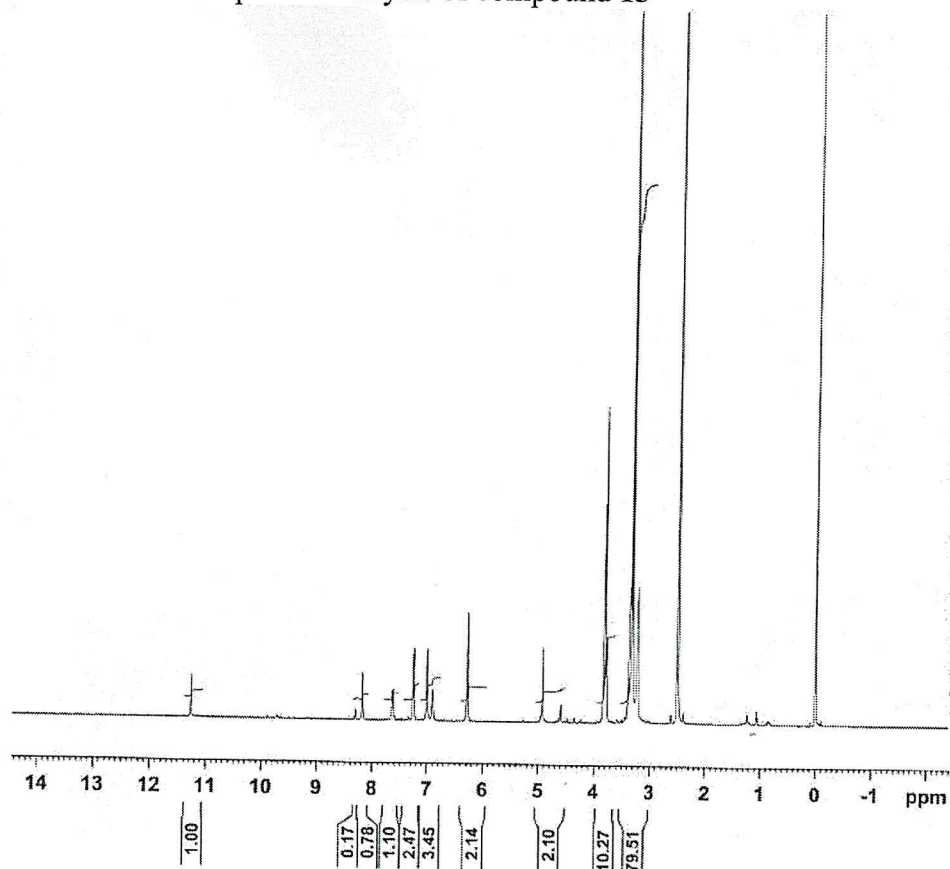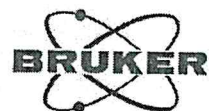

Current Data Parameters  
NAME O.C-PC1246Mto  
EXPNO 10  
PROCNO 1

F2 - Acquisition Parameters  
Date 20140820  
Time 6.50  
INSTRUM spect  
PROBHD 5 mm PABBO BB/  
PULPROG zg30  
TD 65536  
SOLVENT DMSO  
NS 16  
DS 2  
SWH 12019.230 Hz  
FIDRES 0.184399 Hz  
AQ 2.7262976 sec  
RG 90.5  
DM 41.600 usec  
DE 6.50 usec  
TE 297.0 K  
D1 1.00000000 sec  
TD0 1

===== CHANNEL f1 =====  
SFO1 600.1337060 MHz  
NUC1 1H  
P1 10.50 usec  
PLW1 25.00000000 W

F2 - Processing parameters  
SI 65536  
SF 600.1300036 MHz  
WDW EM  
SSB 0  
LB 0.30 Hz  
GB 0  
PC 1.00

**Data 39.  $^{13}\text{C}$ -NMR spectral analysis of compound 13**

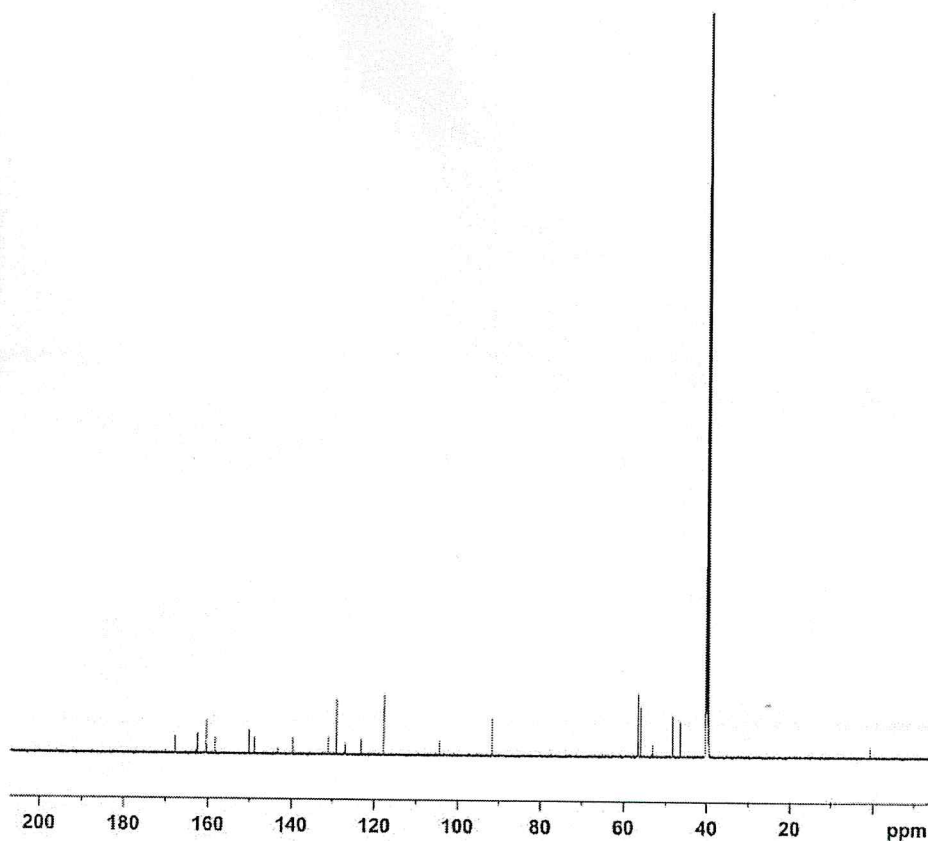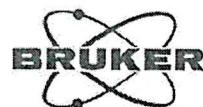

Current Data Parameters  
NAME O.C-PC1246Mto  
EXPNO 12  
PROCNO 1

F2 - Acquisition Parameters  
Date 20140820  
Time 11.25  
INSTRUM spect  
PROBHD 5 mm PABBO BB/  
PULPROG zgpg30  
TD 65536  
SOLVENT DMSO  
NS 1024  
DS 4  
SWH 36057.691 Hz  
FIDRES 0.550197 Hz  
AQ 0.9087659 sec  
RG 2050  
DM 13.867 usec  
DE 6.50 usec  
TE 297.0 K  
D1 2.00000000 sec  
D11 0.03000000 sec  
TD0 1

===== CHANNEL f1 =====  
SFO1 150.9178981 MHz  
NUC1 13C  
P1 10.50 usec  
PLW1 100.00000000 W

===== CHANNEL f2 =====  
SFO2 600.1324005 MHz  
NUC2 1H  
CPDPRG12 waltz16  
PCPD2 70.00 usec  
PLW2 25.00000000 W  
PLW12 0.56250000 W  
PLW13 0.27562001 W

F2 - Processing parameters  
SI 32768  
SF 150.9020090 MHz  
WDW EM  
SSB 0  
LB 1.00 Hz  
GB 0  
PC 1.40



# **Data 40. Mass spectral analysis of compound 13**

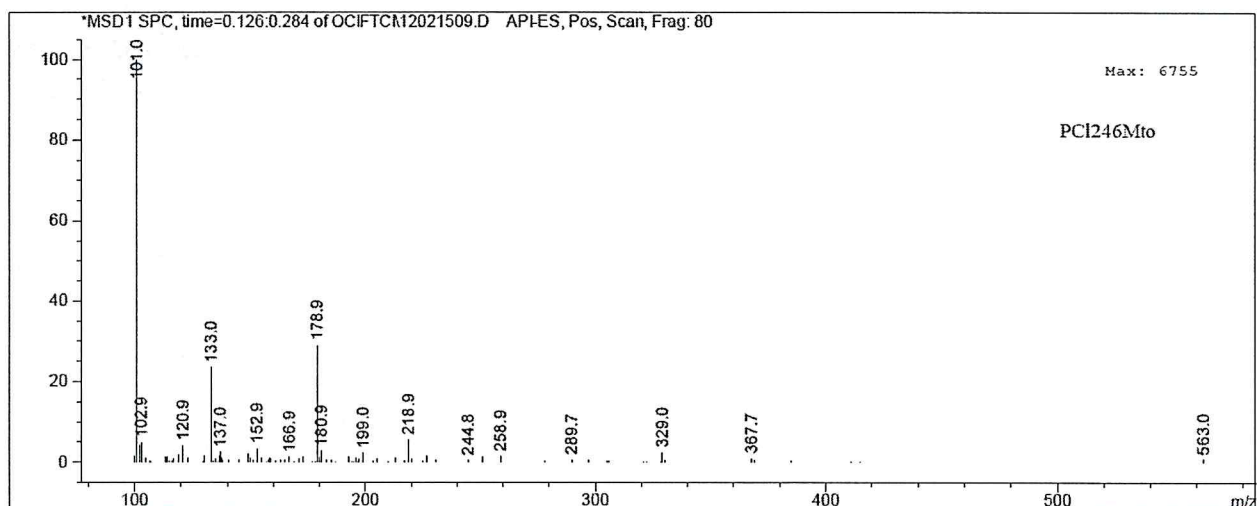

# **Data 41. <sup>1</sup>H-NMR spectral analysis of compound 14**

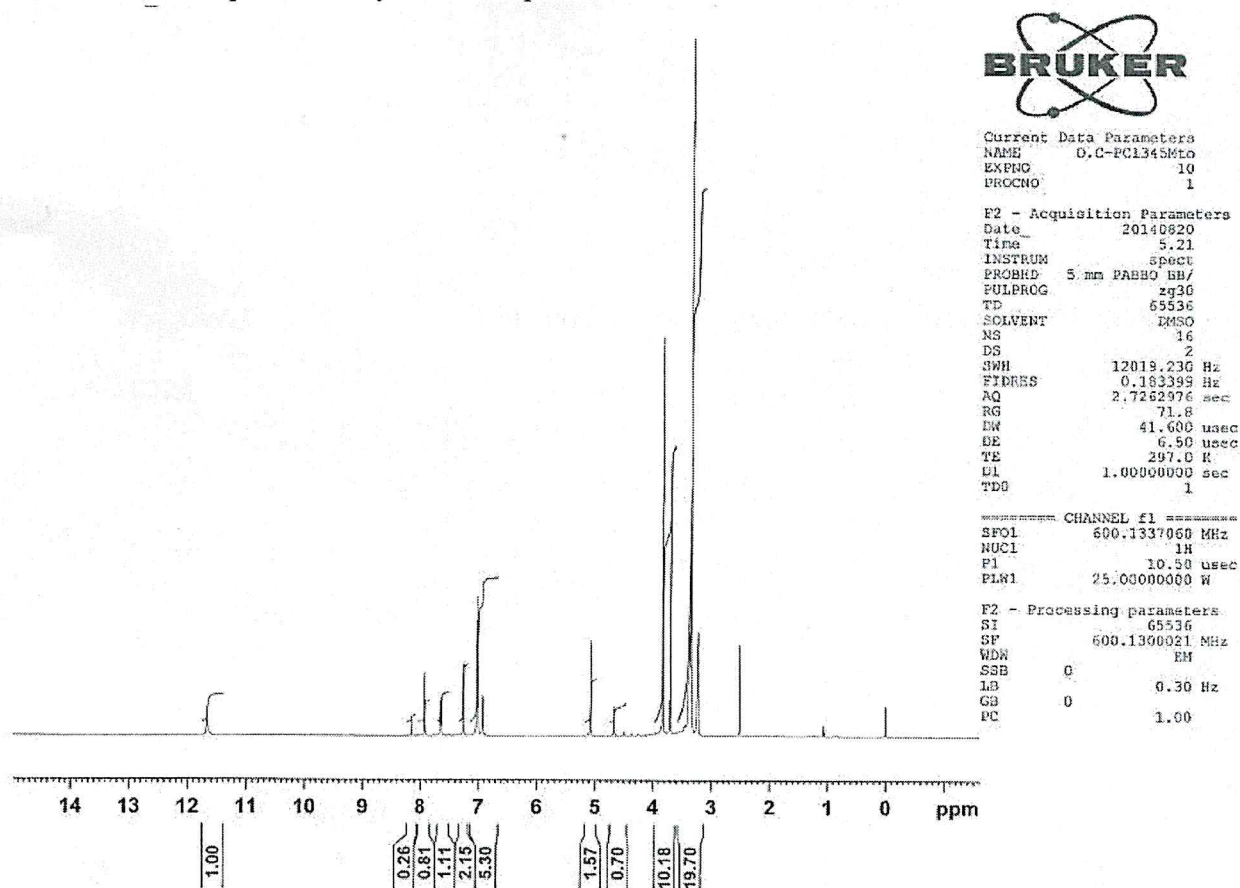

**Data 42.**  $^{13}\text{C}$ -NMR spectral analysis of compound **14**

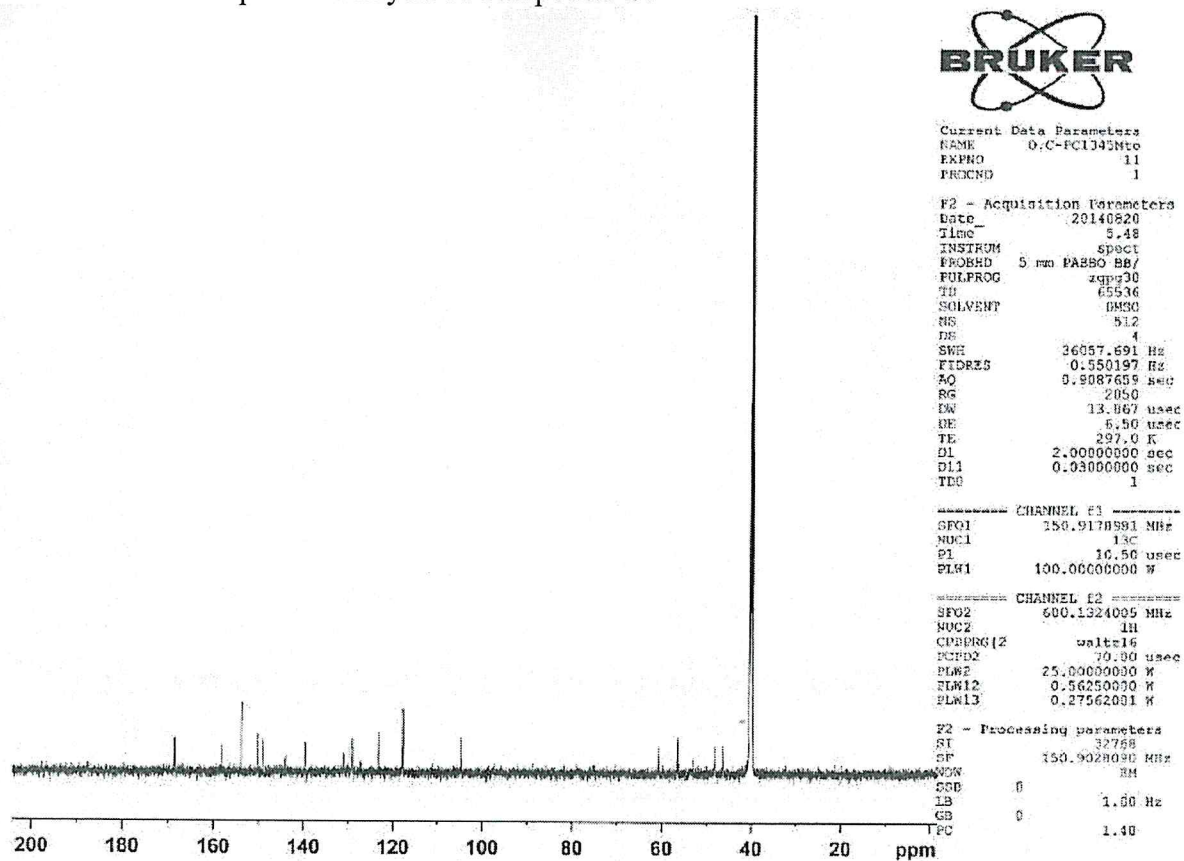

**Data 43.** Mass spectral analysis of compound **14**

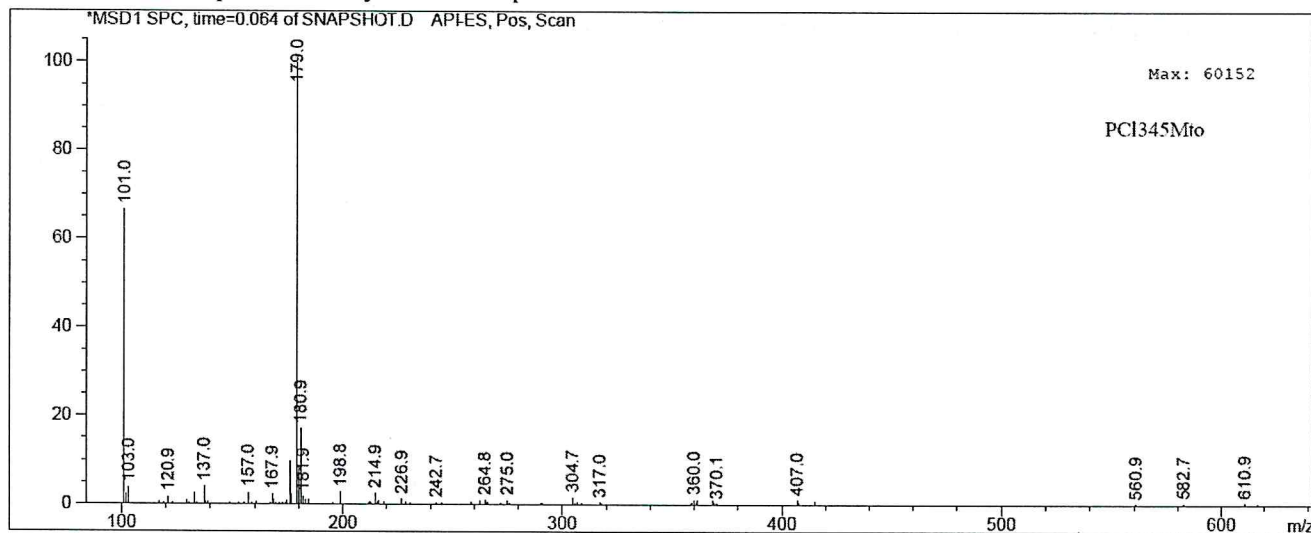

Data 44.  $^1\text{H}$ -NMR spectral analysis of compound 15

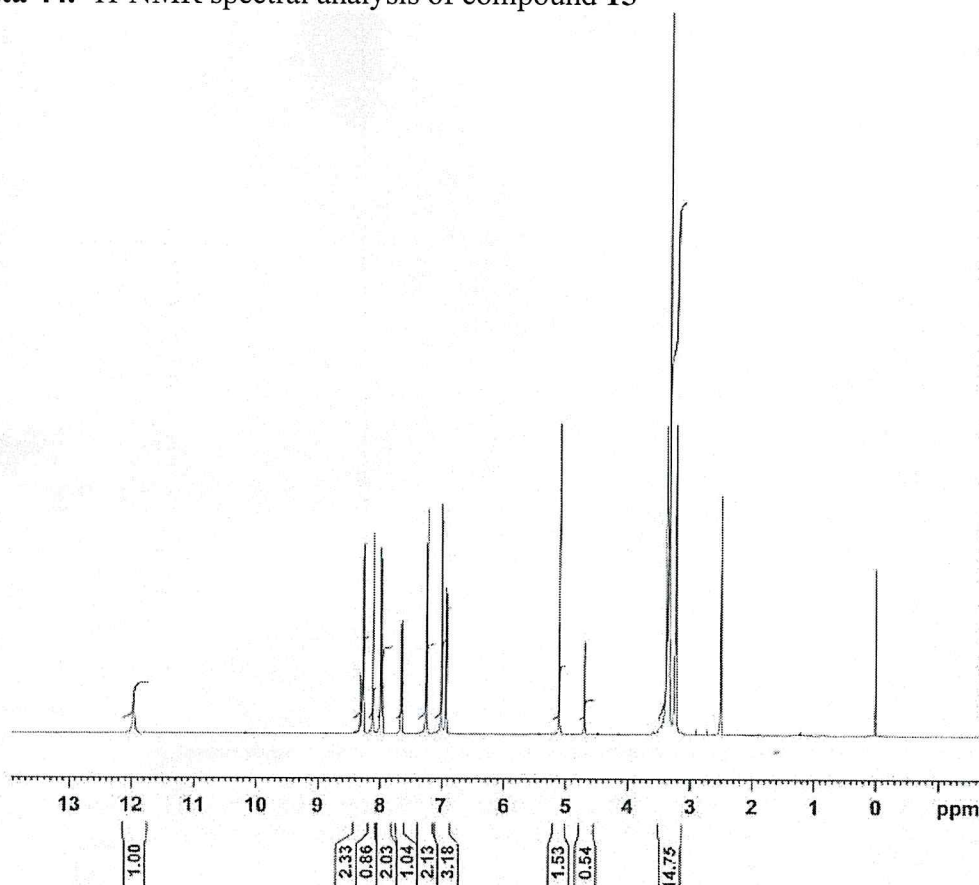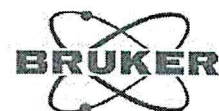

Current Data Parameters  
NAME O.C-PC1NO  
EXPNO 10  
PROCNO 1

F2 - Acquisition Parameters  
Date 20140819  
Time 23.26  
INSTRUM spect  
PROBHD 5 mm PABBO BB/  
PULPROG zg30  
TD 65536  
SOLVENT DMSO  
NS 16  
DS 2  
SWH 12019.230 Hz  
FIDRES 0.183399 Hz  
AQ 2.7262976 sec  
RG 71.8  
DW 41.600 usec  
DE 6.50 usec  
TE 297.0 K  
D1 1.00000000 sec  
TD0 1

CHANNEL f1  
SF01 600.1337060 MHz  
NUC1 1H  
P1 10.50 usec  
PLW1 25.00000000 W

F2 - Processing parameters  
SI 65536  
SF 600.1300009 MHz  
WDW EM  
SSB 0  
LB 0.30 Hz  
GB 0  
PC 1.00

Data 45.  $^{13}\text{C}$ -NMR spectral analysis of compound 15

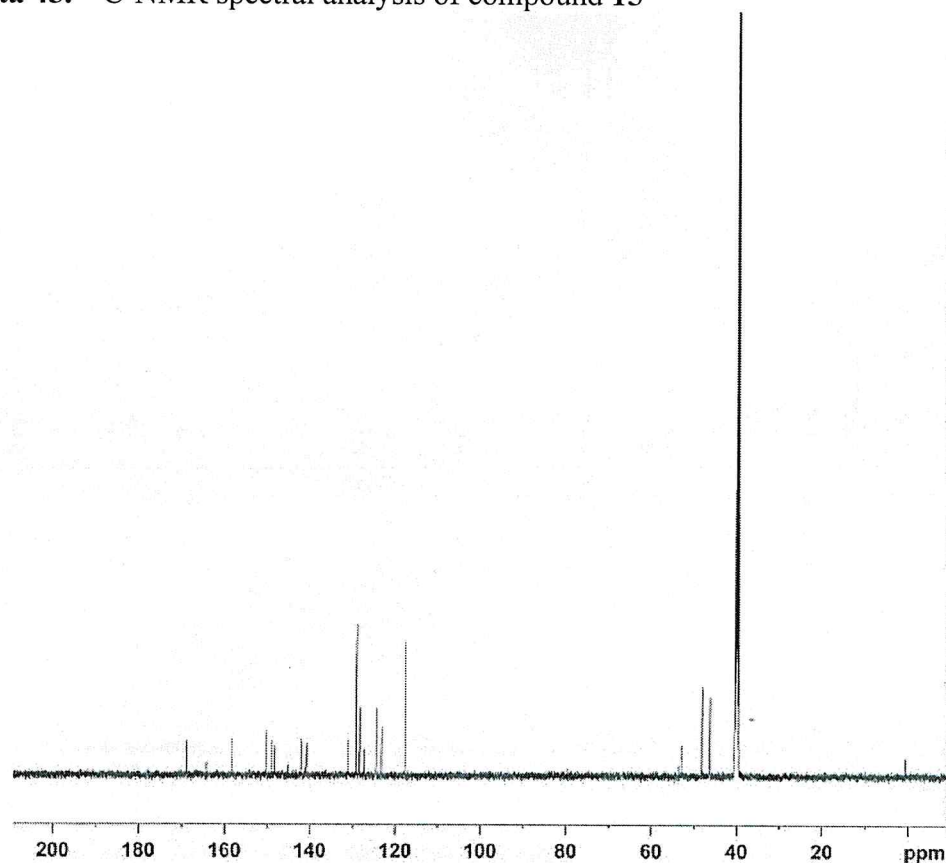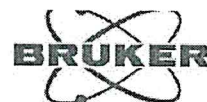

Current Data Parameters  
NAME O.C-PC1NO  
EXPNO 11  
PROCNO 1

F2 - Acquisition Parameters  
Date 20140819  
Time 23.52  
INSTRUM spect  
PROBHD 5 mm PABBO BB/  
PULPROG zgpg30  
TD 65536  
SOLVENT DMSO  
NS 512  
DS 4  
SWH 36057.691 Hz  
FIDRES 0.550197 Hz  
AQ 0.9087659 sec  
RG 2050  
DW 13.867 usec  
DE 6.50 usec  
TE 297.0 K  
D1 2.00000000 sec  
D11 0.03000000 sec  
TD0 1

CHANNEL f1  
SF01 150.9178901 MHz  
NUC1 13C  
P1 10.50 usec  
PLW1 100.00000000 W

CHANNEL f2  
SF02 600.1324005 MHz  
NUC2 1H  
CPDPRG2 waltz16  
PCPD2 70.00 usec  
PLW2 25.00000000 W  
PLW12 0.56250000 W  
PLW13 0.27562001 W

F2 - Processing parameters  
SI 32768  
SF 150.9028090 MHz  
WDW EM  
SSB 0  
LB 1.00 Hz  
GB 0  
PC 1.40

# Data 46. Mass spectral analysis of compound 15

## Qualitative Analysis Report

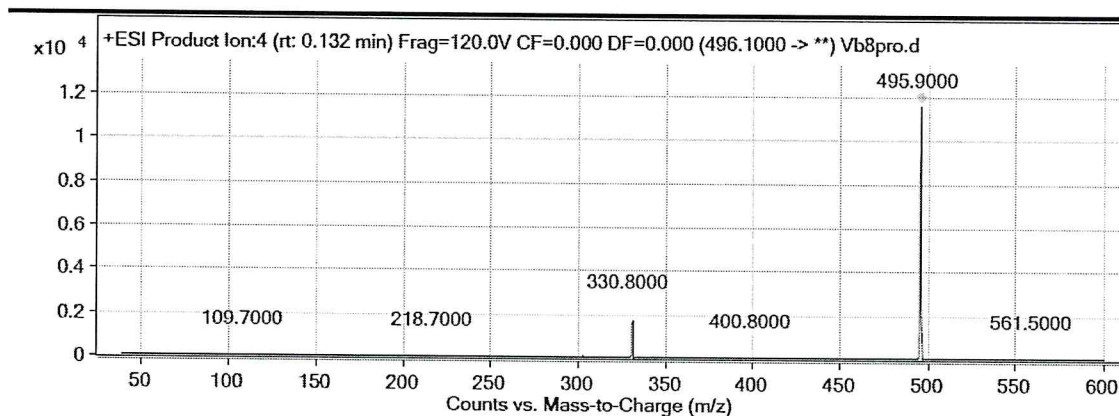

### Peak List

| m/z   | z | Abund    |
|-------|---|----------|
| 109.7 | 2 | 49.88    |
| 150.1 |   | 49.12    |
| 275.5 | 2 | 50.56    |
| 302.6 | 2 | 127.04   |
| 327.5 | 2 | 53.7     |
| 330.8 |   | 1760.5   |
| 353.6 | 2 | 48.98    |
| 486   |   | 49.1     |
| 495.9 |   | 11614.72 |
| 497   |   | 71.86    |

# Data 47. <sup>1</sup>H-NMR spectral analysis of compound 16

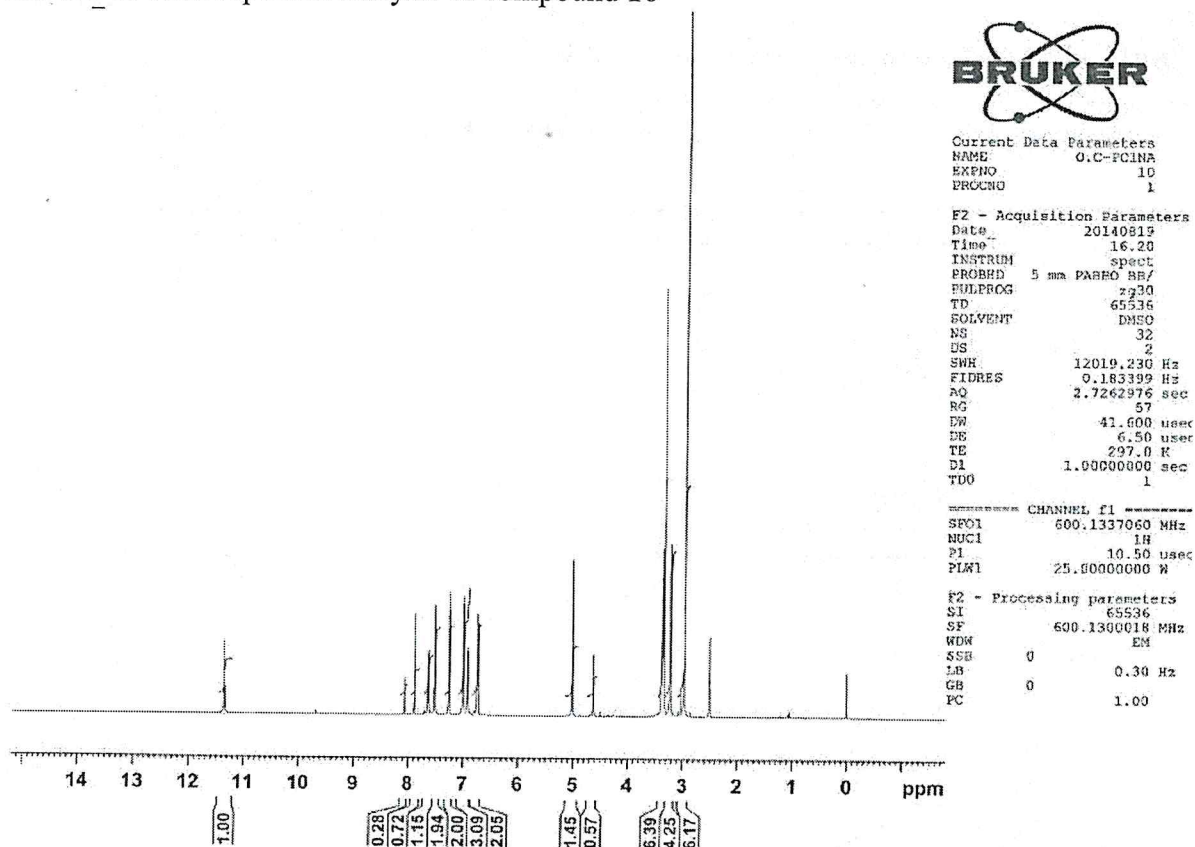

**Data 48.**  $^{13}\text{C}$ -NMR spectral analysis of compound 16

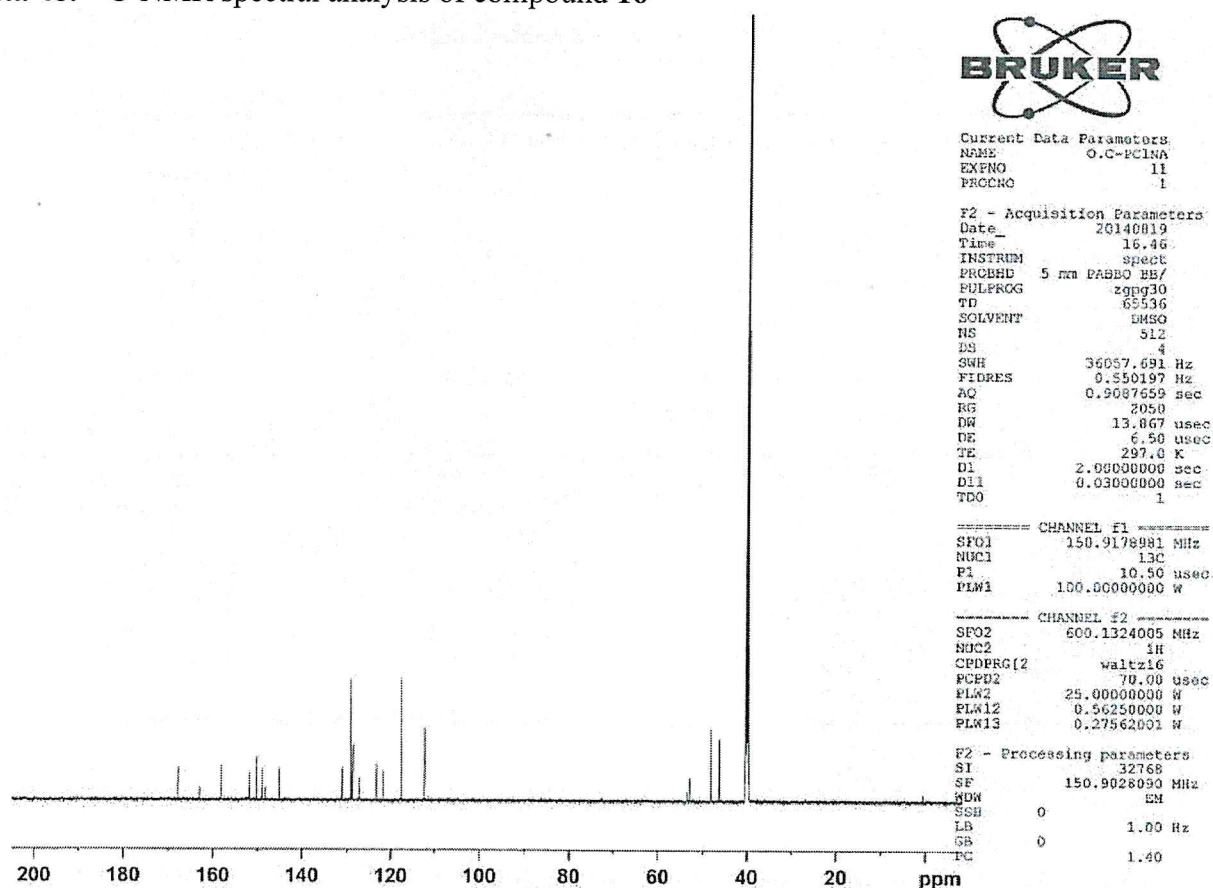

**Data 49.** Mass spectral analysis of compound 16

**Qualitative Analysis Report**

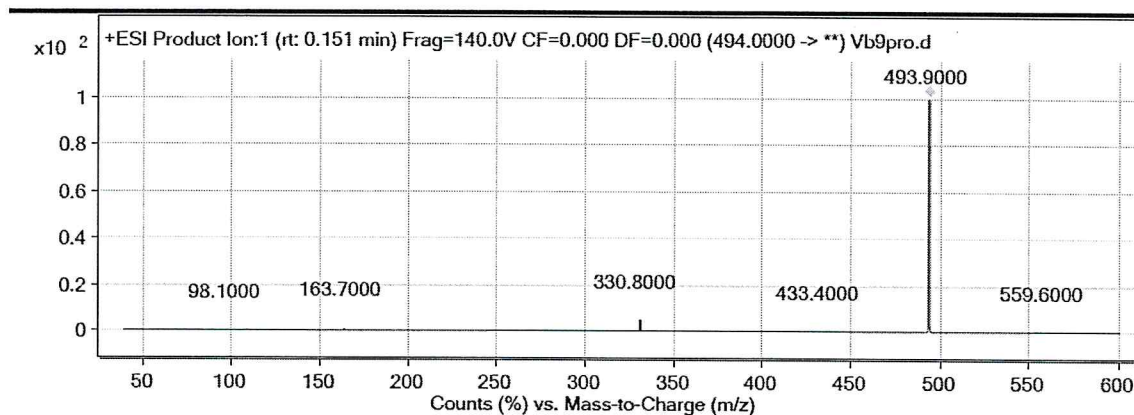

**Peak List**

| m/z   | z | Abund    |
|-------|---|----------|
| 152.9 |   | 53.56    |
| 163.7 | 2 | 509.82   |
| 175.5 | 2 | 76.96    |
| 203.2 |   | 56.4     |
| 204.2 |   | 75.58    |
| 221   |   | 58.16    |
| 302.6 | 2 | 289.62   |
| 330.8 |   | 3890.98  |
| 493.9 |   | 78139.02 |
| 495.4 |   | 54.96    |



**BRUKER**

```

Current Data Parameters
NAME      O.C_PFFH
EXPNO     11
PROCNO    1

F2 - Acquisition Parameters
Date_     20150303
Time      19.09
INSTRUM   spect
PROBHD    5 mm PABBO BB/
PULPROG   zgpg30
TD        65536
SOLVENT   DMSO
NS         1024
DS         4
SWH        36057.691 Hz
FIDRES     0.550197 Hz
AQ         0.9087659 sec
RG         2050
DN         13.867 usec
DE         6.50 usec
TE         296.0 K
D1         2.00000000 sec
D11        0.03000000 sec
TD0        1

===== CHANNEL f1 =====
SF01       150.9178981 MHz
NUC1       13C
P1         10.50 usec
PLW1       100.0000000 W

===== CHANNEL f2 =====
SF02       600.1324005 MHz
NUC2       1H
CPDPRG[2] waltz16
PCPD2      70.00 usec
ELW2       25.00000000 W
FLW12      0.56250000 W
PLW13      0.27562001 W

F2 - Processing parameters
SI         32768
SF         150.9026090 MHz
WDW        FM
SSB        0
LB         1.00 Hz
GB         0
EC         1.40
  
```

# **Data 52. Mass spectral analysis of compound 17**

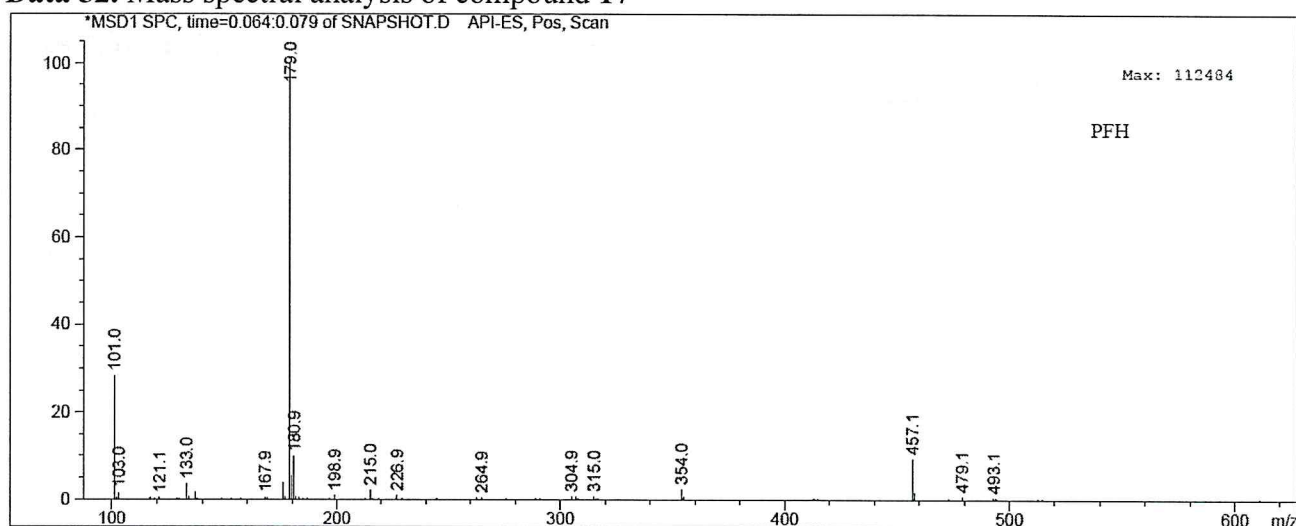

# **Data 53. <sup>1</sup>H-NMR spectral analysis of compound 18**

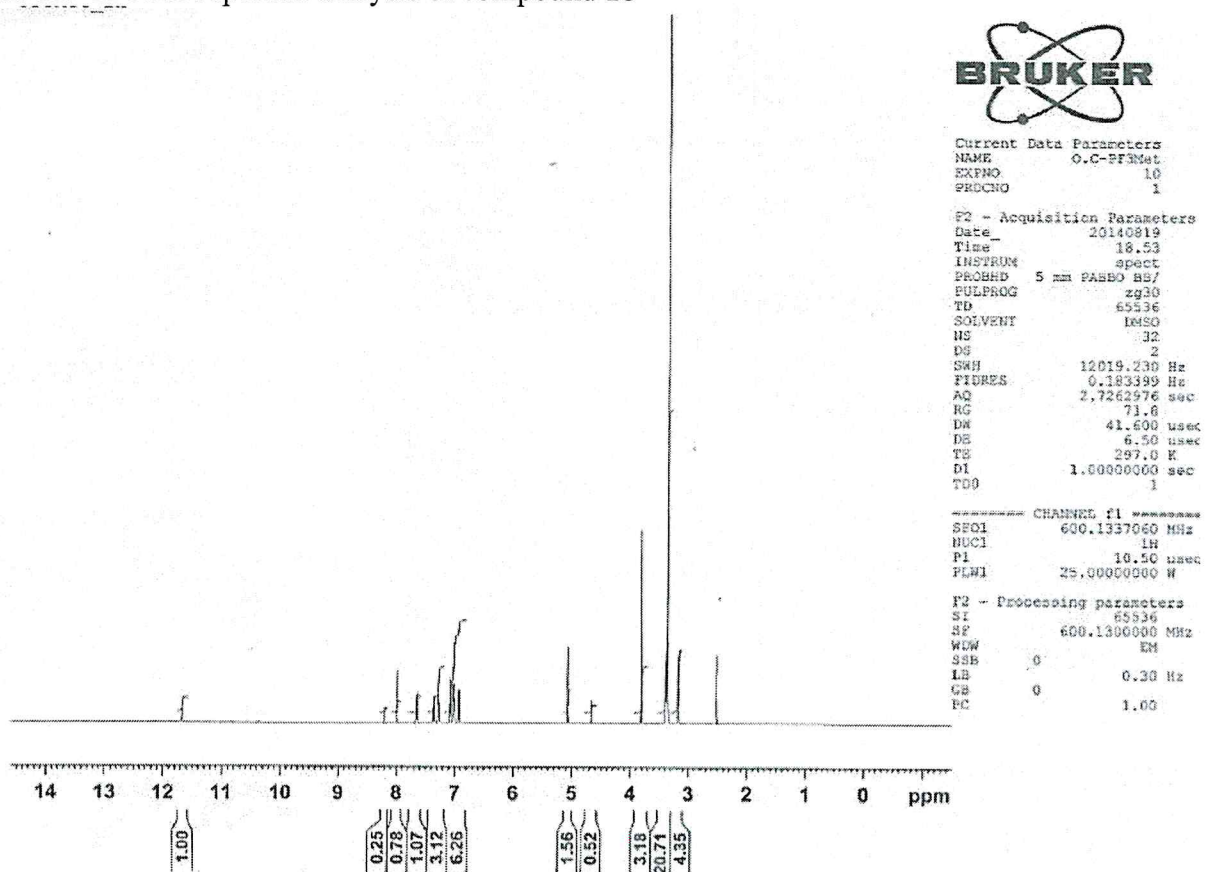

**Data 54.  $^{13}\text{C}$ -NMR spectral analysis of compound 18**

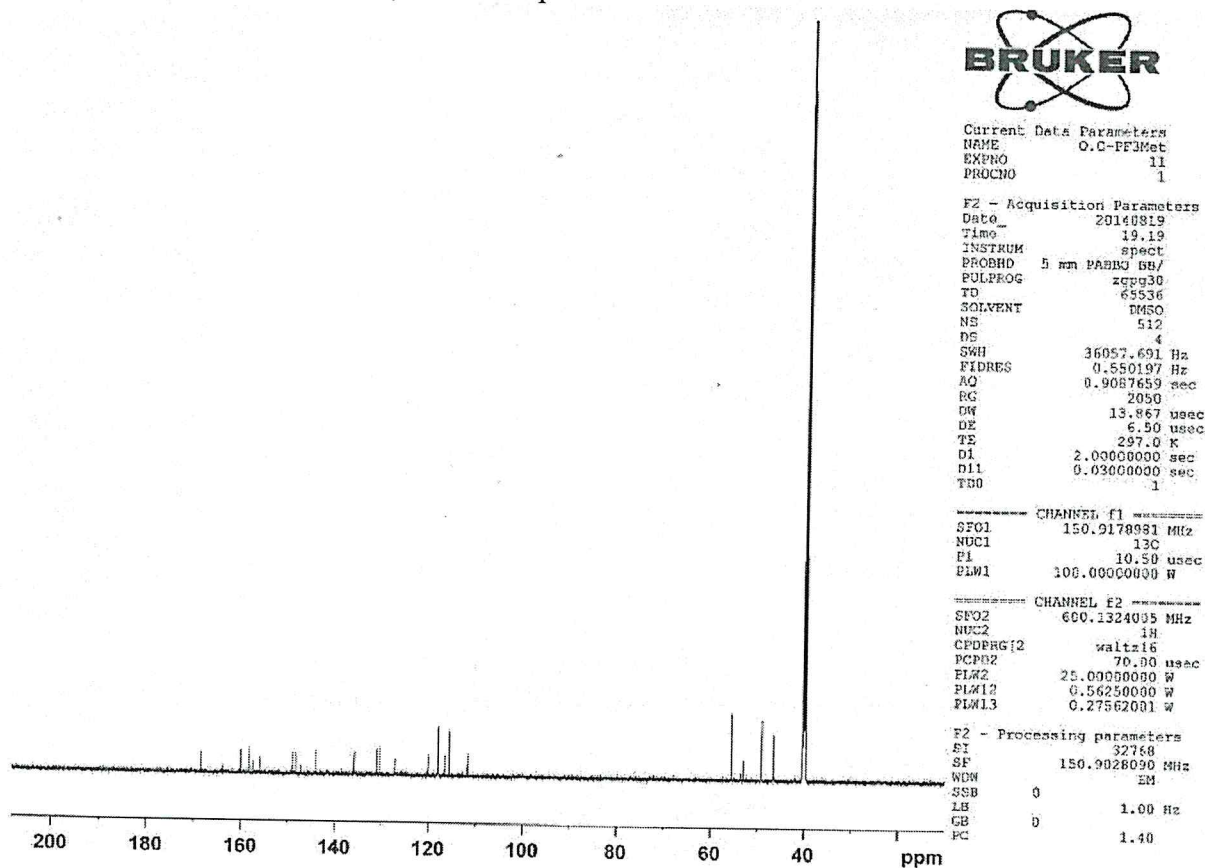

**Data 55. Mass spectral analysis of compound 18**  
**Qualitative Analysis Report**

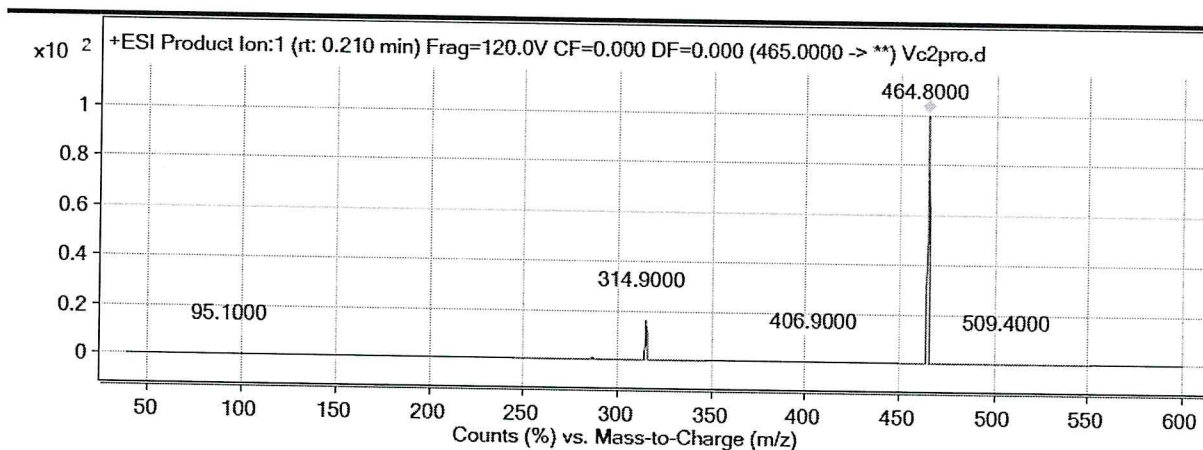

**Peak List**

| m/z   | z | Abund     |
|-------|---|-----------|
| 94    |   | 56.28     |
| 95.1  |   | 75.34     |
| 96.9  |   | 56.44     |
| 121.6 | 2 | 60.74     |
| 137   |   | 72.66     |
| 149.8 |   | 68.82     |
| 162.2 |   | 54.92     |
| 286.6 | 2 | 1324.7    |
| 314.9 |   | 26129.38  |
| 464.8 |   | 161148.52 |

**Data 56.**  $^1\text{H}$ -NMR spectral analysis of compound **19**

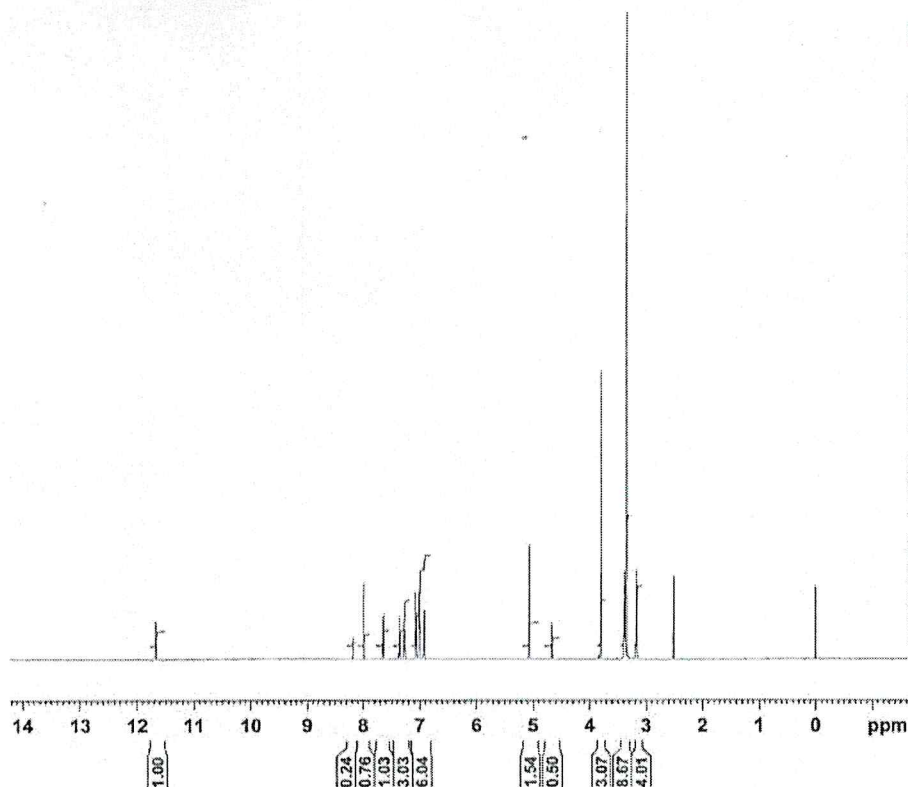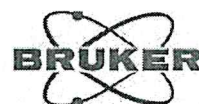

Current Data Parameters  
NAME O.C-PF3Mto  
EXPNO 10  
PROCNO 1

F2 - Acquisition Parameters  
Date\_ 20140819  
Time 19.23  
INSTRUM spect  
PROBHD 5 mm PABBO BB/  
PULPROG zgpg30  
TD 65536  
SOLVENT DMSO  
NS 32  
DS 2  
SWH 12019.230 Hz  
FIDRES 0.183399 Hz  
AQ 2.7262976 sec  
RG 71.8  
DW 41.600 usec  
DE 6.50 usec  
TE 297.0 K  
D1 1.00000000 sec  
TD0 1

===== CHANNEL f1 =====  
SFO1 600.1337060 MHz  
NUC1 1H  
P1 10.50 usec  
PLW1 25.00000000 W

F2 - Processing parameters  
SI 65536  
SF 600.1300820 MHz  
WDW EM  
SSB 0  
LB 0.30 Hz  
GB 0  
PC 1.00

**Data 57.**  $^{13}\text{C}$ -NMR spectral analysis of compound **19**

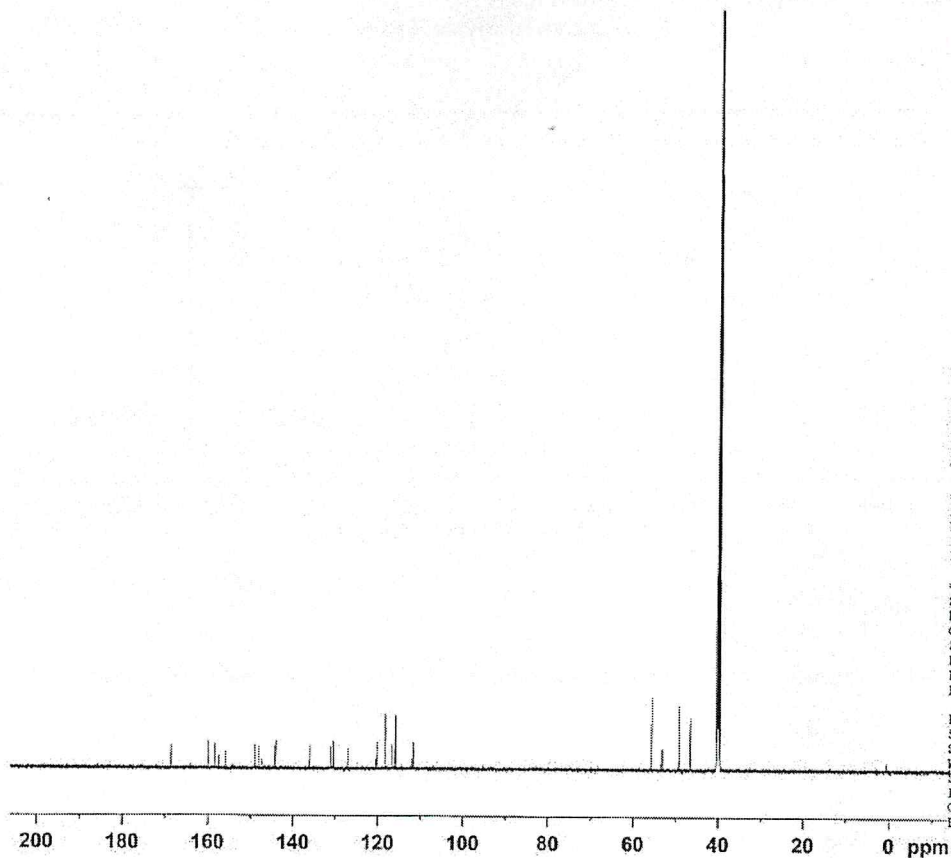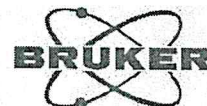

Current Data Parameters  
NAME O.C-PF3Mto  
EXPNO 11  
PROCNO 1

F2 - Acquisition Parameters  
Date\_ 20140819  
Time 19.50  
INSTRUM spect  
PROBHD 5 mm PABBO BB/  
PULPROG zgpg30  
TD 65536  
SOLVENT DMSO  
NS 512  
DS 4  
SWH 36057.691 Hz  
FIDRES 0.550197 Hz  
AQ 0.9067659 sec  
RG 2050  
DW 13.867 usec  
DE 6.50 usec  
TE 297.0 K  
D1 2.00000000 sec  
D11 0.03000000 sec  
TD0 1

===== CHANNEL f1 =====  
SFO1 150.9178981 MHz  
NUC1 13C  
P1 10.50 usec  
PLW1 100.00000000 W

===== CHANNEL f2 =====  
SFO2 600.1324095 MHz  
NUC2 1H  
CPDPRGf2 waltz16  
ZCPRG2 70.00 usec  
PLW2 25.00000000 W  
PLW12 0.56250000 W  
PLW13 0.27562001 W

F2 - Processing parameters  
SI 32768  
SF 150.9028090 MHz  
WDW EM  
SSB 0  
LB 1.00 Hz  
GB 0  
PC 1.40

# Data 58. Mass spectral analysis of compound 19

## Qualitative Analysis Report

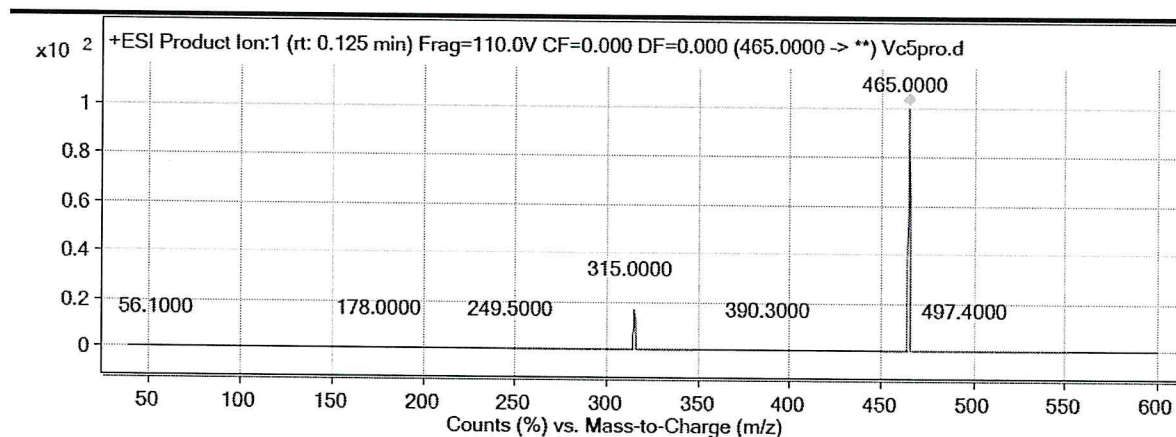

### Peak List

| m/z   | z | Abund    |
|-------|---|----------|
| 56.1  |   | 56.24    |
| 94.1  |   | 51.08    |
| 122.2 |   | 51.12    |
| 178   |   | 58.2     |
| 249.5 | 2 | 59.02    |
| 272.2 |   | 54.22    |
| 286.5 | 2 | 70.4     |
| 315   |   | 3012.14  |
| 390.3 |   | 53.62    |
| 465   |   | 18277.52 |

# Data 59. <sup>1</sup>H-NMR spectral analysis of compound 20

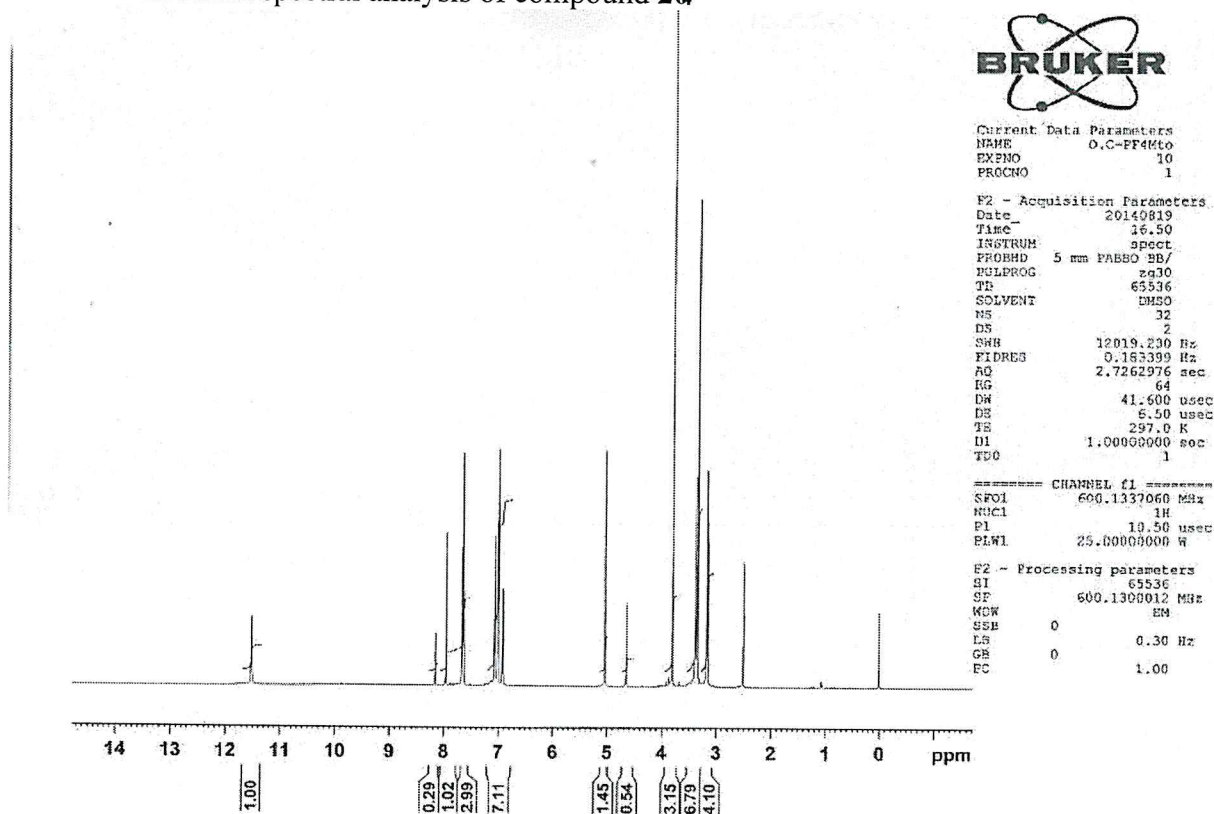



**Data 60.**  $^{13}\text{C}$ -NMR spectral analysis of compound **20**

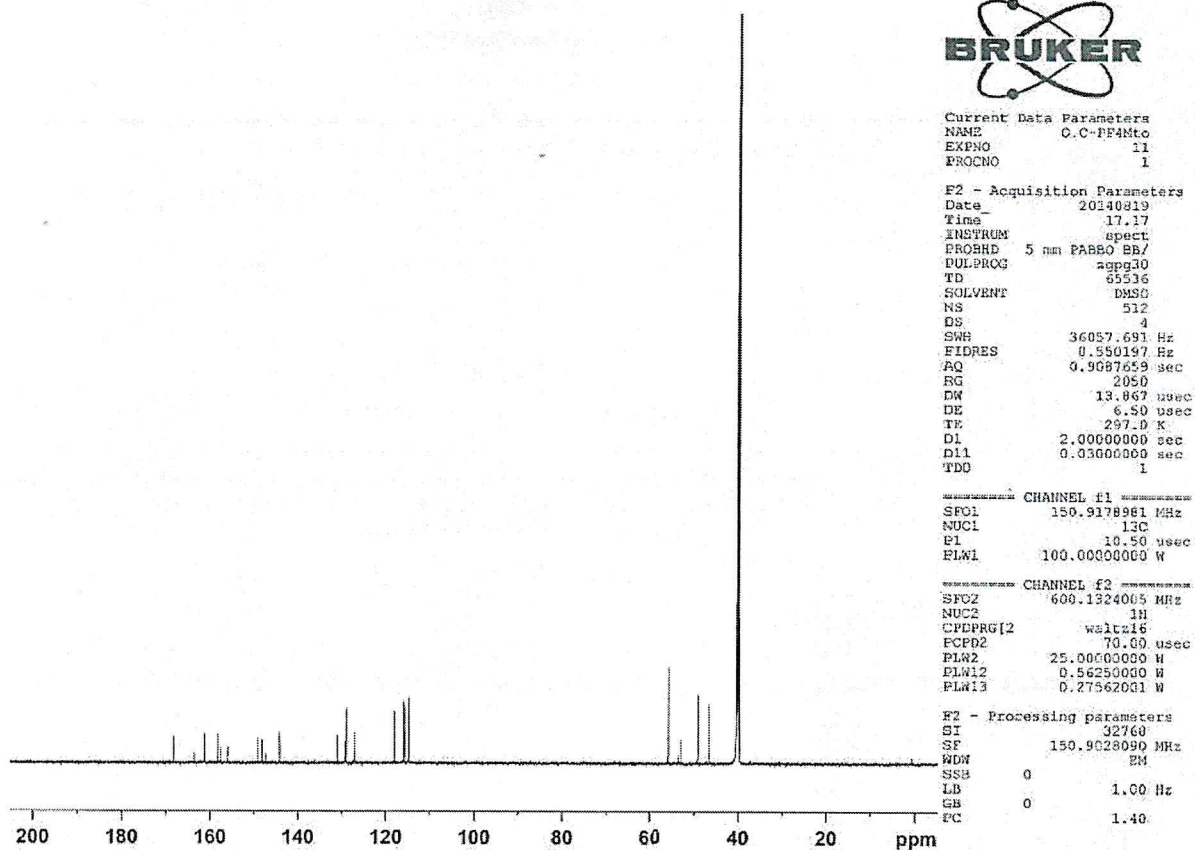

**Data 61.** Mass spectral analysis of compound **20**

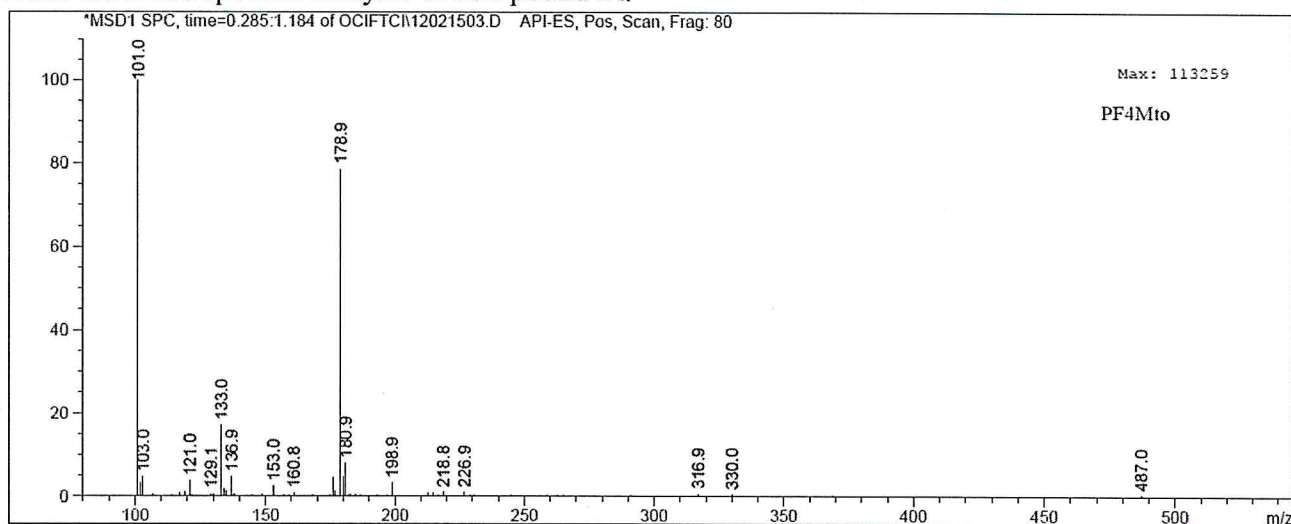

Data 62.  $^1\text{H}$ -NMR spectral analysis of compound 21

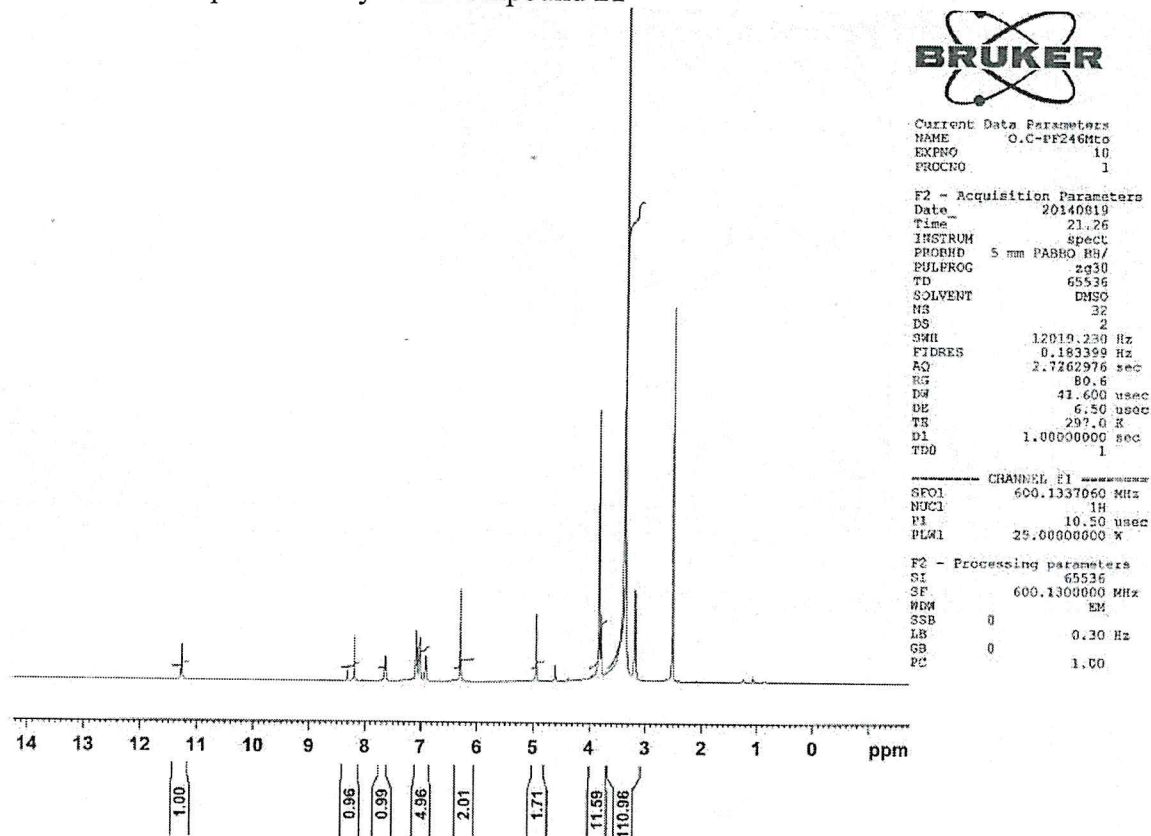

Data 63.  $^{13}\text{C}$ -NMR spectral analysis of compound 21

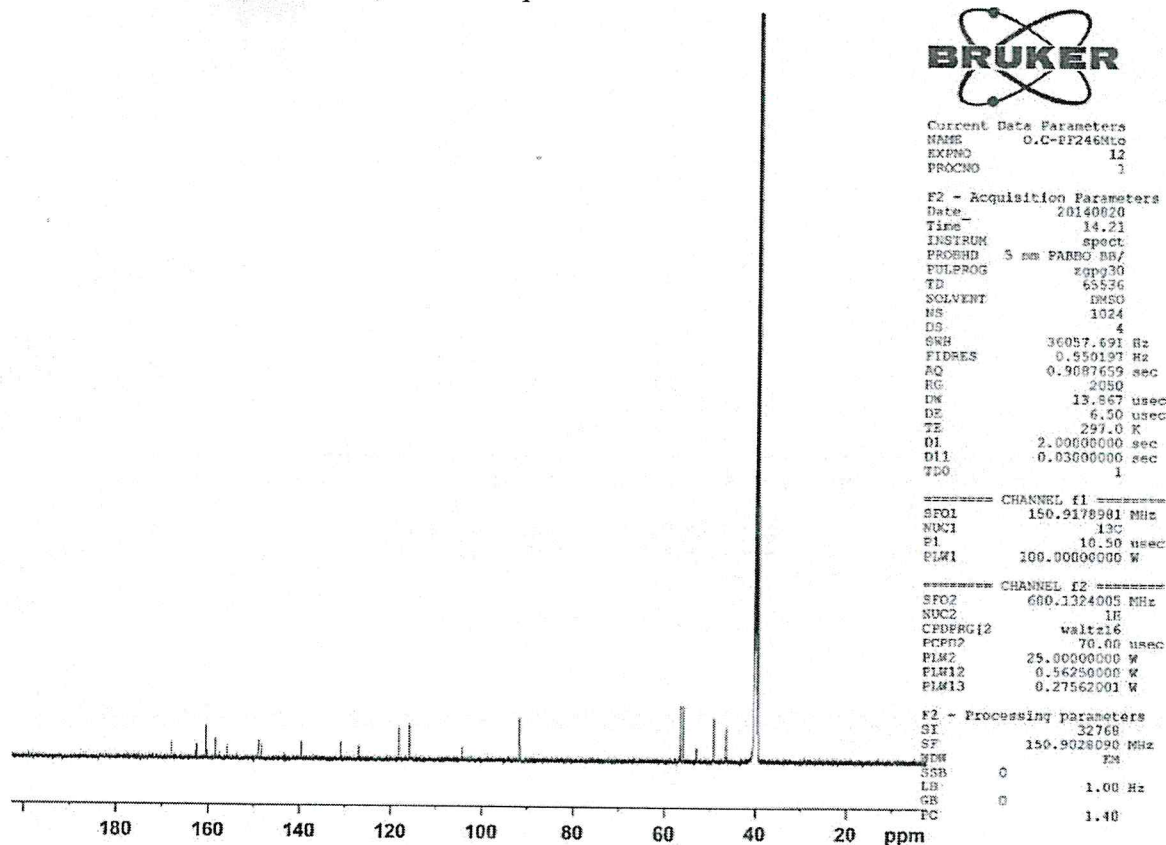

# **Data 64. Mass spectral analysis of compound 21**

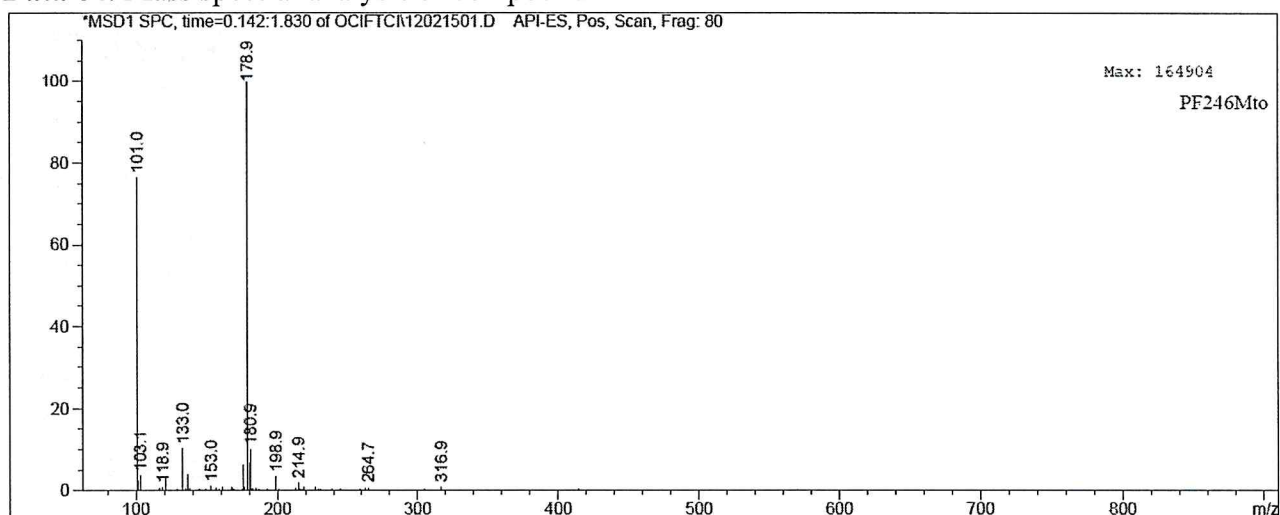

# **Data 65. <sup>1</sup>H-NMR spectral analysis of compound 22**

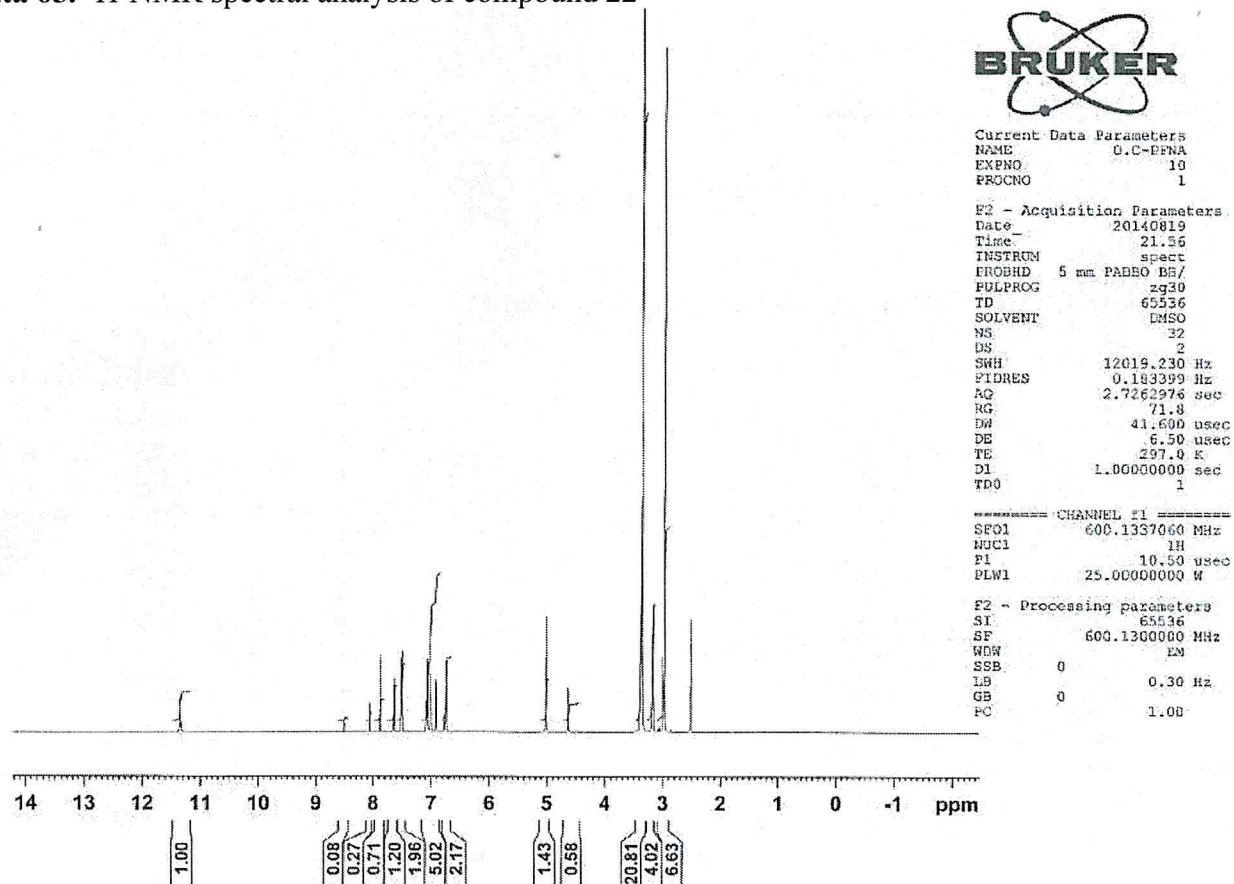

Data 66.  $^{13}\text{C}$ -NMR spectral analysis of compound 22

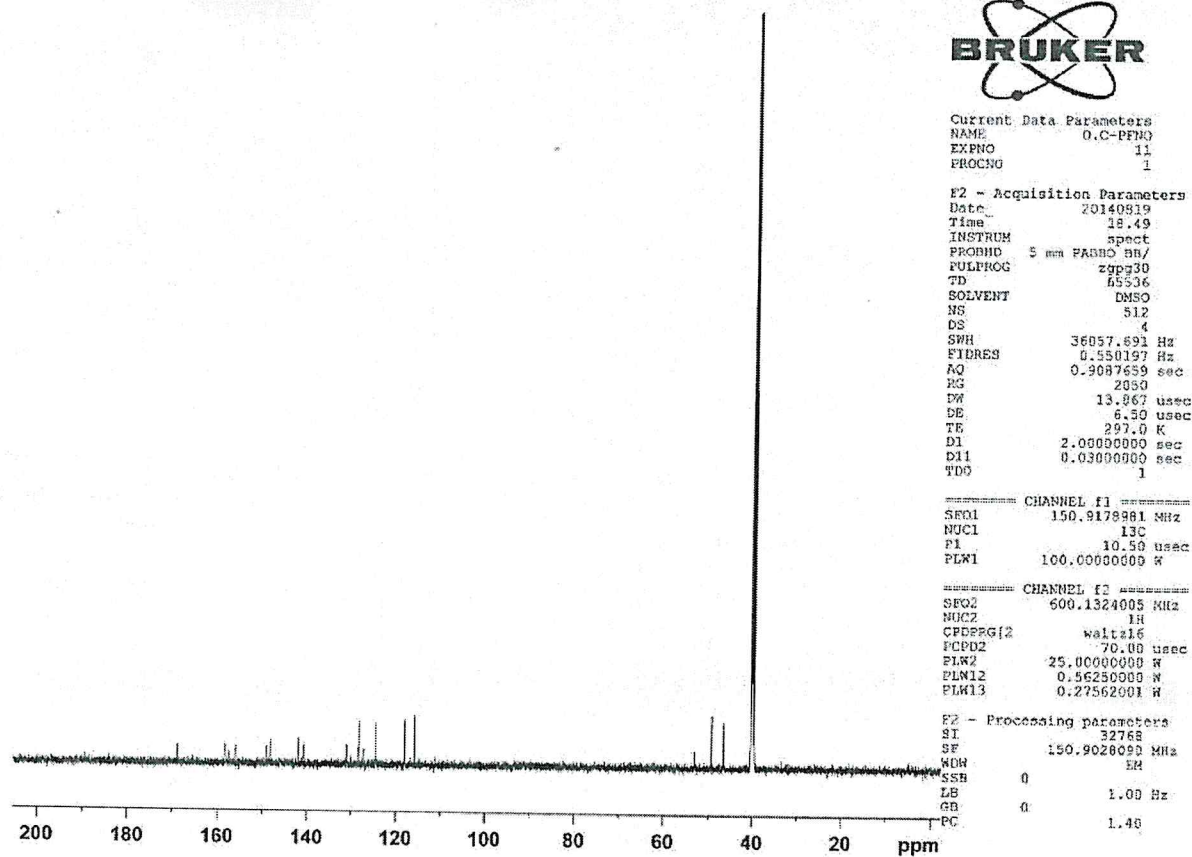

Data 67. Mass spectral analysis of compound 22

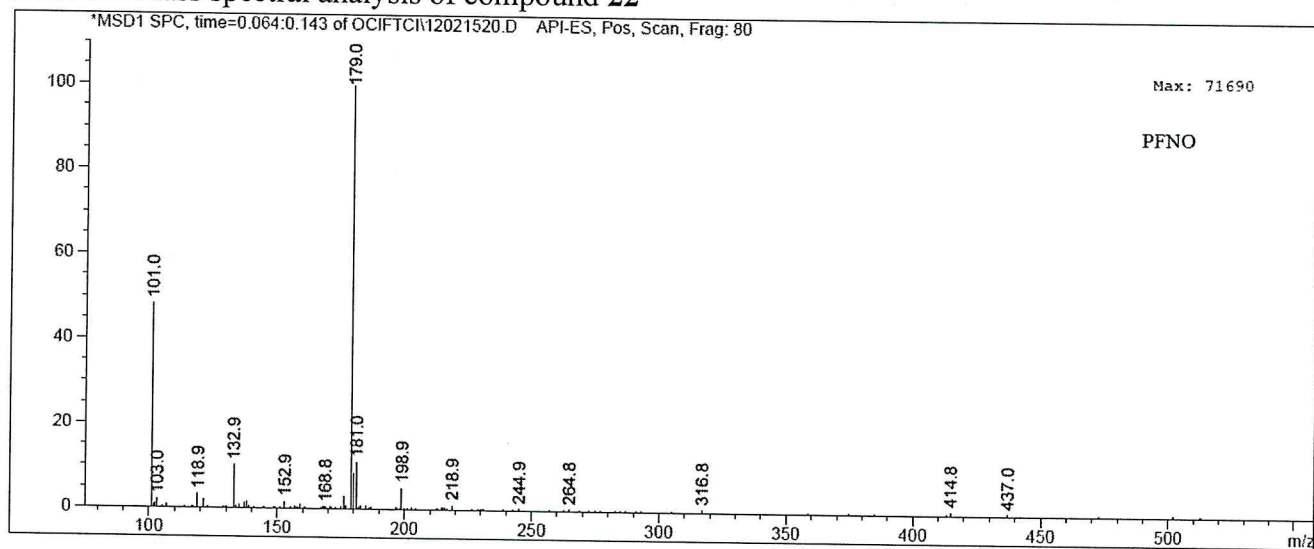

Data 68.  $^1\text{H}$ -NMR spectral analysis of compound 23

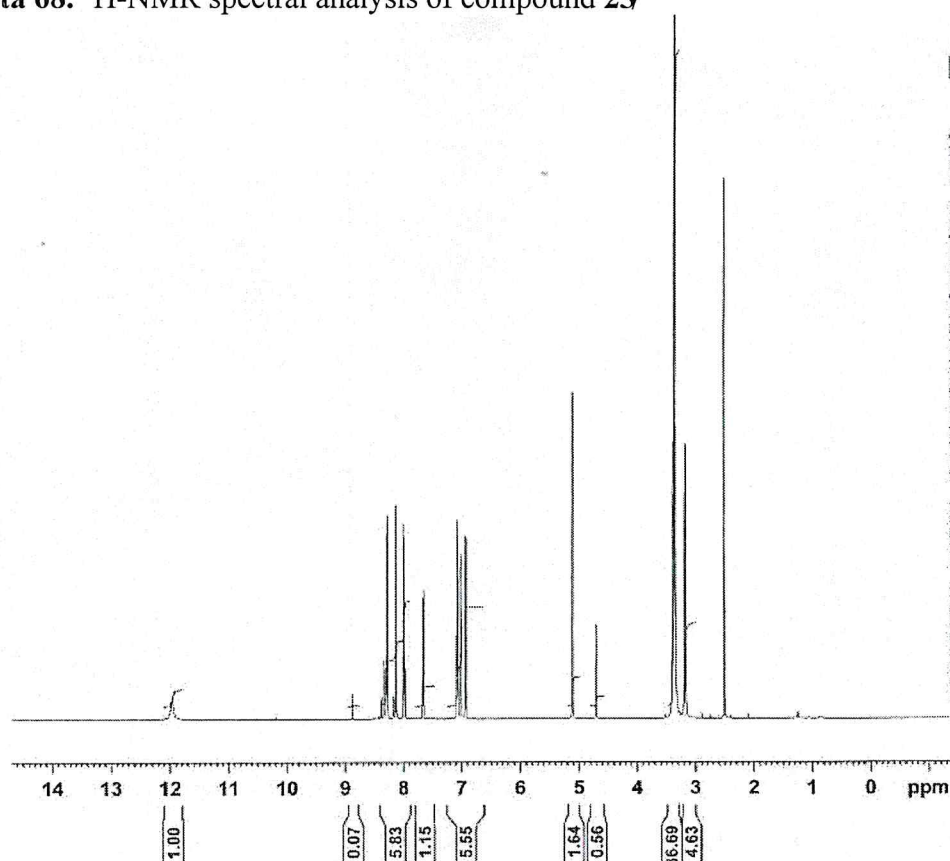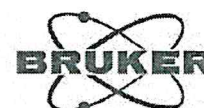

Current Data Parameters  
NAME O.C-PFNO  
EXPNO 10  
PROCNO 1

F2 - Acquisition Parameters  
Date\_ 20140819  
Time 18.22  
INSTRUM spect  
PROBHD 5 mm PABBO BB/  
PULPROG zg30  
TD 65536  
SOLVENT DMSO  
NS 32  
DS 2  
SWH 12019.230 Hz  
FIDRES 0.183393 Hz  
AQ 2.7262976 sec  
RG 80.6  
DW 41.500 usec  
DE 6.50 usec  
TE 297.0 K  
D1 1.0000000 sec  
TD0 1

===== CHANNEL f1 =====  
SFO1 600.1337069 MHz  
NUC1 1H  
P1 10.50 usec  
PLW1 25.00000000 W

F2 - Processing parameters  
SI 65536  
SF 600.1300005 MHz  
WDW EN  
SSB 0  
LB 0.30 Hz  
GB 0  
PC 1.03

Data 69.  $^{13}\text{C}$ -NMR spectral analysis of compound 23

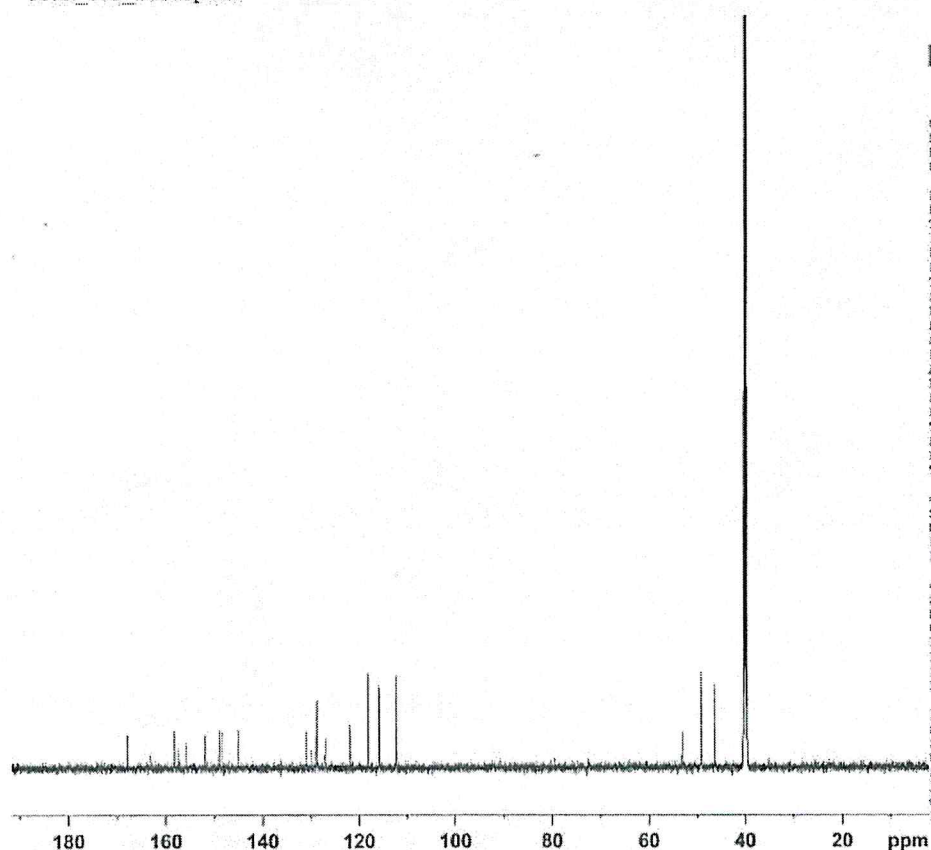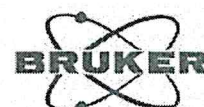

Current Data Parameters  
NAME O.C-PFNA  
EXPNO 11  
PROCNO 1

F2 - Acquisition Parameters  
Date\_ 20140819  
Time 22.22  
INSTRUM spect  
PROBHD 5 mm PABBO BB/  
PULPROG zgpg30  
TD 65536  
SOLVENT DMSO  
NS 512  
DS 4  
SWH 36057.691 Hz  
FIDRES 0.550197 Hz  
AQ 0.9087659 sec  
RG 2050  
DW 13.867 usec  
DE 6.50 usec  
TE 297.0 K  
D1 2.0000000 sec  
D11 0.0300000 sec  
TD0 1

===== CHANNEL f1 =====  
SFO1 150.9178981 MHz  
NUC1 13C  
P1 10.50 usec  
PLW1 100.00000000 W

===== CHANNEL f2 =====  
SFO2 600.1324005 MHz  
NUC2 1H  
PCPRPG[2] waltz16  
PCPB2 70.00 usec  
PLW2 25.00000000 W  
PLW12 0.56280000 W  
PLW13 0.27562001 W

F2 - Processing parameters  
SI 32768  
SF 150.9028090 MHz  
WDW EM  
SSB 0  
LB 1.00 Hz  
GB 0  
PC 1.40



# Data 70. Mass spectral analysis of compound 23

## Qualitative Analysis Report

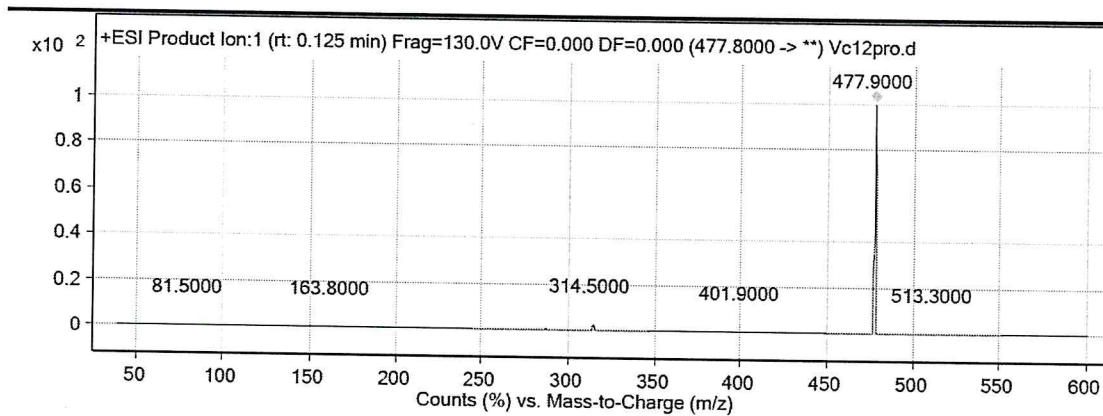

### Peak List

| m/z   | z | Abund    |
|-------|---|----------|
| 163.8 |   | 166.08   |
| 176.5 | 2 | 54.06    |
| 259.5 | 2 | 53.76    |
| 286.8 |   | 206.02   |
| 314.5 | 2 | 980.46   |
| 332.1 |   | 50.7     |
| 472   |   | 51.46    |
| 476   |   | 64.92    |
| 477.9 |   | 36509.84 |
| 513.3 |   | 50.8     |
